# Supplementary material for: Transcriptomics of cardiac biopsies reveals differences in patients with or without diagnostic parameters for heart failure with preserved ejection fraction
Source: PubMed Central journal article supplement (PMC6395693; doi:10.1038/s41598-019-39445-2), 2019-02-28
Supplement: 41598_2019_39445_MOESM1_ESM.pdf [file 41598_2019_39445_MOESM1_ESM.pdf]

# Supplementary Materials for

## **Transcriptomics of cardiac biopsies reveals differences in patients with or without diagnostic parameters for heart failure with preserved ejection fraction**

Sarbashis Das<sup>1,\*</sup>, Christoffer Frisk<sup>1,\*</sup>, Maria J Eriksson<sup>2,3</sup>, Anna Walentinsson<sup>4</sup>, Matthias Corbascio<sup>3,5</sup>, Camilla Hage<sup>6,7</sup>, Chanchal Kumar<sup>4,8</sup>, Michaela Asp<sup>9</sup>, Joakim Lundeberg<sup>9</sup>, Eva Maret<sup>2,3</sup>, Hans Persson<sup>10,11</sup>, Cecilia Linde<sup>6,7</sup> and Bengt Persson<sup>1,12</sup>

<sup>1</sup>Department of Cell and Molecular Biology, Science for Life Laboratory, Uppsala University, S-751 24 Uppsala, Sweden; <sup>2</sup>Karolinska University Hospital, Department of Clinical Physiology, S-171 76 Stockholm, Sweden; <sup>3</sup>Karolinska Institutet, Department of Molecular Medicine and Surgery, S-171 77 Stockholm, Sweden; <sup>4</sup>Translational Sciences, Cardiovascular, Renal and Metabolic Diseases, IMED Biotech Unit, AstraZeneca, S-431 83 Gothenburg, Sweden; <sup>5</sup>Karolinska University Hospital, Department of Thoracic Surgery, S-171 76 Stockholm, Sweden; <sup>6</sup>Karolinska Institutet, Department of Medicine, S-171 77 Stockholm, Sweden; <sup>7</sup>Karolinska University Hospital, Heart and Vascular Theme, S-171 76 Stockholm, Sweden; <sup>8</sup>Integrated Cardio Metabolic Center (ICMC), Department of Medicine, Karolinska Institutet, S-141 57 Huddinge, Sweden; <sup>9</sup>Science for Life Laboratory, Royal Institute of Technology, S-171 21 Stockholm, Sweden; <sup>10</sup>Karolinska Institutet, Department of Clinical Sciences, Danderyd Hospital, S-182 88 Stockholm, Sweden; <sup>11</sup>Danderyd Hospital, Department of Cardiology, S-182 88 Stockholm, Sweden; <sup>12</sup>Department of Medical Biochemistry and Biophysics, Science for Life Laboratory, Karolinska Institutet, S-17177 Stockholm, Sweden

\*These authors contributed equally to the work.

# Supplementary Figure S1

A

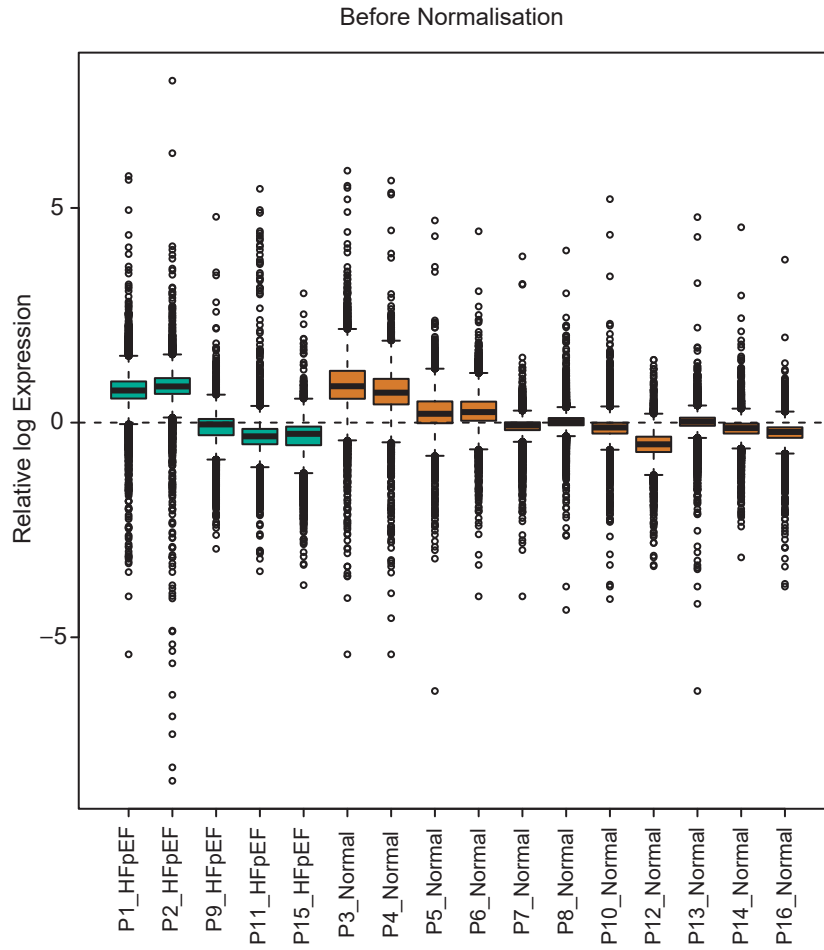

B

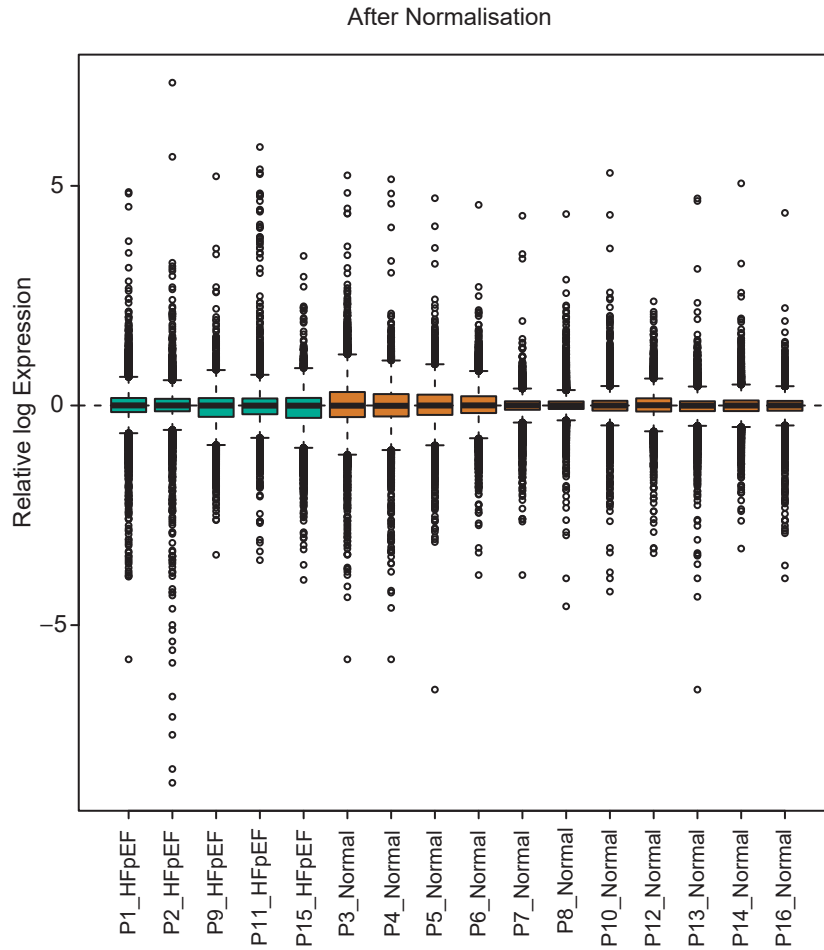

**Supplementary Figure S1. Normalization of the raw count of the gene expression values.** The graphs show before (top) and after (bottom) normalization. The x axis shows the samples and the y axis relative expression in log<sub>2</sub> scale.

## Supplementary Figure S2

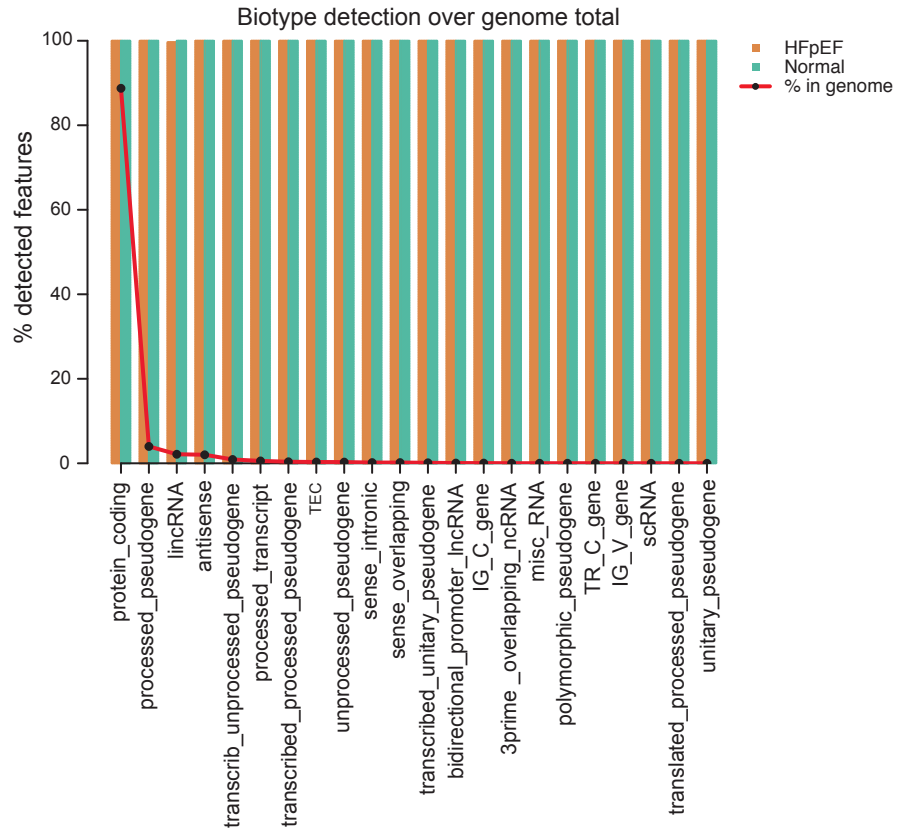

**Supplementary Figure S2. Annotation overview and statistics of the genes identified by read alignment.** Bar plot showing percentage of each biotype in the genome being detected in the sample. The x axis represents different biotypes and the y axis represents percentage of biotypes detected. The red line shows percentage of biotypes in the genome detected.

# Supplementary Figure S3

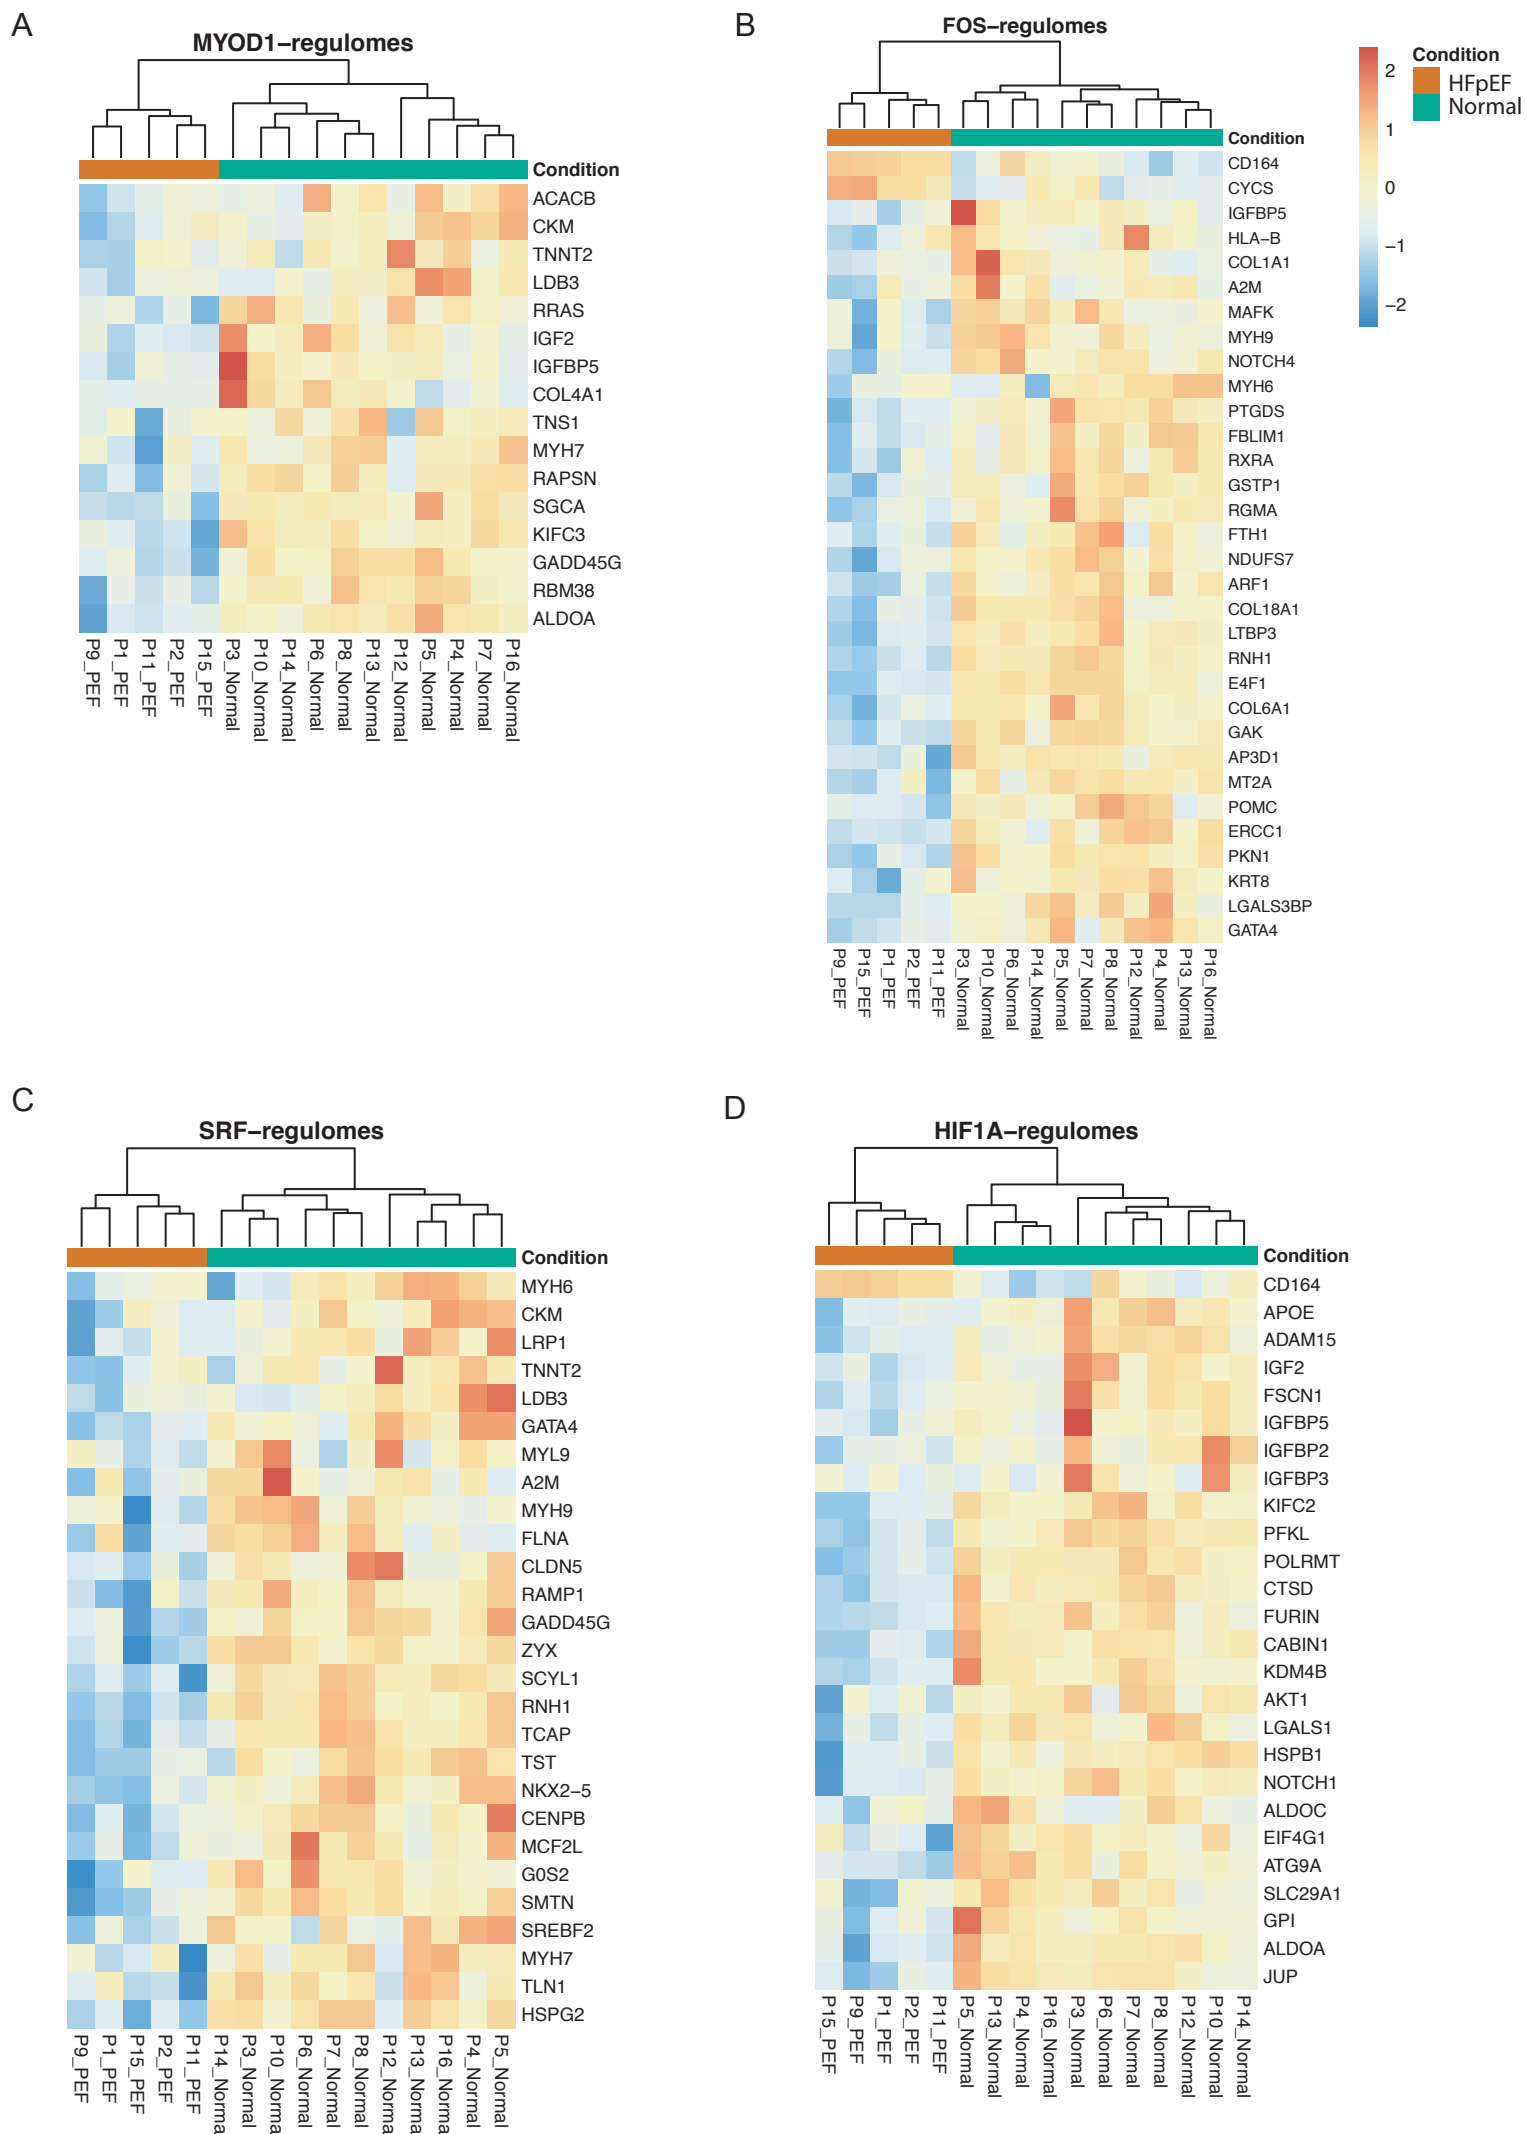

**Supplementary Figure S3. Gene expression profiles of selected transcription factor regulons detected in differentially expressed genes.** Heat maps showing the expression profiles of the genes regulated by predicted transcription factors by IPA similarly to those plotted in Figure 4B–F. A. *MYOD1*, B. *FOS*, C. *SRF*, and D. *HIF1A*. Samples were clustered using unsupervised hierarchical clustering approach.

## Supplementary Tables

Supplementary Table S1. List of differentially expressed genes in HFpEF proxy compared with Normal

| Row.names      | HFPEF_mea<br>n | Normal_mea<br>n | theta        | prob        | log2FC       | length | GC    | Chro<br>m | GeneStart | GeneEnd   | Biotype        | wikigene_description                                            | percentag<br>e_gene_gc<br>_content | hgnc_symb<br>ol |
|----------------|----------------|-----------------|--------------|-------------|--------------|--------|-------|-----------|-----------|-----------|----------------|-----------------------------------------------------------------|------------------------------------|-----------------|
| ENS00000002330 | 21.80993167    | 74.51161079     | -1.788930853 | 0.981277793 | -1.772480001 | 14874  | 53.92 | 11        | 64269830  | 64284704  | protein_coding | BCL2 associated agonist of cell death                           | 53.92                              | BAD             |
| ENS00000004399 | 805.0686262    | 1260.536272     | -1.493456863 | 0.976093705 | -0.64685396  | 51643  | 58.39 | 3         | 129555175 | 129606818 | protein_coding | plexin D1                                                       | 58.39                              | PLXND1          |
| ENS00000005007 | 777.1690456    | 1152.935443     | -1.554889693 | 0.977039249 | -0.56901388  | 36298  | 55.16 | 19        | 18831938  | 18868236  | protein_coding | UPF1, RNA helicase and ATPase                                   | 55.16                              | UPF1            |
| ENS00000007080 | 200.2813766    | 410.0623653     | -1.894577307 | 0.987965885 | -1.033815065 | 10975  | 55.84 | 19        | 17933016  | 17943991  | protein_coding | coiled-coil domain containing 124                               | 55.84                              | CCDC124         |
| ENS00000007376 | 34.18974402    | 93.50464307     | -1.479599388 | 0.975927021 | -1.451474384 | 3423   | 67.17 | 16        | 784974    | 788397    | protein_coding | RNA pseudouridylylate synthase domain containing 1              | 67.17                              | RPUSD1          |
| ENS00000007520 | 233.9440961    | 398.0809099     | -1.292722978 | 0.954841918 | -0.766897867 | 2671   | 62.57 | 16        | 1349240   | 1351911   | protein_coding | TSR3, acp transferase ribosome maturation factor                | 62.57                              | TSR3            |
| ENS00000007541 | 108.5946677    | 218.197624      | -1.403545454 | 0.967429204 | -1.006682128 | 17141  | 64.36 | 16        | 566995    | 584136    | protein_coding | phosphatidylinositol glycan anchor biosynthesis class Q         | 64.36                              | PIGQ            |
| ENS00000008710 | 691.2358133    | 1467.899421     | -2.578550692 | 0.997359513 | -1.086503248 | 47188  | 63.1  | 16        | 2088710   | 2135898   | protein_coding | polycystin 1, transient receptor potential channel interacting  | 63.1                               | PKD1            |
| ENS00000010256 | 18200.37496    | 20575.46302     | -1.30533203  | 0.956272831 | -0.176956723 | 11974  | 53.04 | 3         | 48599002  | 48610976  | protein_coding | ubiquinol-cytochrome c reductase core protein I                 | 53.04                              | UQCRC1          |
| ENS00000010322 | 619.5853794    | 883.721521      | -1.254584033 | 0.951235062 | -0.512288717 | 37953  | 53.28 | 3         | 52455118  | 52493071  | protein_coding | nischarin                                                       | 53.28                              | NISCH           |
| ENS00000010327 | 229.9629245    | 462.8783141     | -1.398690521 | 0.96688314  | -1.00919129  | 29157  | 60.65 | 3         | 52495338  | 52524495  | protein_coding | stabilin 1                                                      | 60.65                              | STAB1           |
| ENS00000011009 | 258.3331941    | 434.44376       | -1.360059662 | 0.963618684 | -0.749936796 | 4569   | 62.39 | 1         | 27390970  | 27395539  | protein_coding | lysophospholipase II                                            | 62.39                              | LYPLA2          |
| ENS00000011132 | 47.80072094    | 102.603018      | -1.275955387 | 0.953003537 | -1.101968885 | 10880  | 56.64 | 19        | 3750819   | 3761699   | protein_coding | amyloid beta precursor protein binding family A member 3        | 56.64                              | APBA3           |
| ENS00000011451 | 274.4137391    | 564.0767808     | -1.949962433 | 0.98709866  | -1.039538838 | 29971  | 58.16 | 19        | 15419980  | 15449951  | protein_coding | widely interspaced zinc finger motifs                           | 58.16                              | WIZ             |
| ENS00000012061 | 1143.975582    | 1568.856501     | -1.513255927 | 0.976091889 | -0.45565714  | 71495  | 52.1  | 19        | 45407333  | 45478828  | protein_coding | ERCC excision repair 1, endonuclease non-catalytic subunit      | 52.1                               | ERCC1           |
| ENS00000013306 | 496.8773478    | 785.7111742     | -1.400065299 | 0.967030664 | -0.661109228 | 5245   | 61.11 | 17        | 44319625  | 44324870  | protein_coding | solute carrier family 25 member 39                              | 61.11                              | SLC25A39        |
| ENS00000014164 | 77.43204448    | 159.5092809     | -1.268203532 | 0.952239444 | -1.042637728 | 103798 | 58.38 | 8         | 143437655 | 143541453 | protein_coding | zinc finger CCHC-type containing 3                              | 58.38                              | ZC3H3           |
| ENS00000014216 | 904.457128     | 1368.089783     | -1.779388587 | 0.980166516 | -0.597038887 | 31440  | 51.18 | 11        | 61805666  | 65212006  | protein_coding | calpain 1                                                       | 51.18                              | CAPN1           |
| ENS00000019144 | 1085.149618    | 1535.382915     | -1.272555939 | 0.952656004 | -0.500704528 | 51598  | 54.3  | 11        | 118606440 | 118658038 | protein_coding | pleckstrin homology like domain family B member 1               | 54.3                               | PHLD1           |
| ENS00000020129 | 407.4051048    | 696.3523708     | -1.700337202 | 0.979086438 | -0.773353472 | 9801   | 57.71 | 1         | 35557473  | 35567274  | protein_coding | neurochondrin                                                   | 57.71                              | NCDN            |
| ENS00000021762 | 121.4672354    | 229.9812262     | -1.35721824  | 0.963308757 | -0.920948883 | 79623  | 57    | 11        | 3087116   | 3166739   | protein_coding | oxysterol binding protein like 5                                | 57                                 | OSBP15          |
| ENS00000023191 | 796.5160855    | 1811.774459     | -2.205423224 | 0.999875591 | -1.185627969 | 12788  | 60.36 | 11        | 494512    | 507300    | protein_coding | ribonuclease/angiogenin inhibitor 1                             | 60.36                              | RNI1            |
| ENS00000024422 | 667.0388822    | 1022.354859     | -1.4487681   | 0.973938537 | -0.616053277 | 29791  | 52.96 | 19        | 47713343  | 47743134  | protein_coding | EH domain containing 2                                          | 52.96                              | EH2             |
| ENS00000030582 | 1267.659363    | 2205.871655     | -2.639933568 | 0.989309819 | -0.799181726 | 8016   | 57.64 | 17        | 44345086  | 44353102  | protein_coding | granulin precursor                                              | 57.64                              | GRN             |
| ENS00000031823 | 546.5924173    | 781.1410037     | -1.283208682 | 0.953784587 | -0.515117547 | 62003  | 52.74 | 19        | 5916139   | 5978142   | protein_coding | RAN binding protein 3                                           | 52.74                              | RANBP3          |
| ENS00000032444 | 217.1377734    | 411.4503628     | -1.596471983 | 0.979688913 | -0.92186848  | 27760  | 55.05 | 19        | 7534004   | 7561764   | protein_coding | patatin like phospholipase domain containing 6                  | 55.05                              | PNPLA6          |
| ENS00000039523 | 504.943272     | 821.0019814     | -1.707707515 | 0.978935529 | -0.701263101 | 28370  | 57.18 | 16        | 67518418  | 67546788  | protein_coding | RHO family interacting cell polarization regulator 1            | 57.05                              | RIPOR1          |
| ENS00000050820 | 287.1381536    | 660.1705904     | -2.026517964 | 0.988122745 | -1.201093828 | 39866  | 59.7  | 16        | 75228187  | 75268053  | protein_coding | BCAR1, Cas family scaffolding protein                           | 59.7                               | BCAR1           |
| ENS00000053918 | 409.2266964    | 704.534876      | -1.664730827 | 0.980948559 | -0.783770867 | 404425 | 51.55 | 11        | 2444684   | 2849109   | protein_coding | potassium voltage-gated channel subfamily Q member 1            | 51.55                              | KCNQ1           |
| ENS00000054148 | 1591.140211    | 2280.481281     | -1.637711964 | 0.981501106 | -0.519277356 | 2303   | 66.23 | 9         | 136848724 | 136851027 | protein_coding | phosphohistidine phosphatase 1                                  | 66.23                              | PHPT1           |
| ENS00000055118 | 1200.030369    | 1922.292749     | -1.927705649 | 0.988610202 | -0.679757147 | 33354  | 59.57 | 7         | 150944961 | 150978315 | protein_coding | potassium voltage-gated channel subfamily H member 2            | 59.57                              | KCNH2           |
| ENS00000058404 | 1677.8866      | 2440.859892     | -1.828110292 | 0.985399428 | -0.540744271 | 117427 | 55.17 | 7         | 44217150  | 44334577  | protein_coding | calcium/calmodulin dependent protein kinase II beta             | 55.17                              | CAMK2B          |
| ENS00000058453 | 35.27328922    | 90.61235669     | -1.283408265 | 0.953806555 | -1.361131673 | 232706 | 49.14 | 1         | 16740273  | 16972979  | protein_coding | ciliary rootlet coiled-coil, rootletin                          | 49.14                              | CROCC           |
| ENS00000059122 | 256.3798074    | 505.3979481     | -1.578436355 | 0.978527355 | -0.979137168 | 39271  | 52.33 | 16        | 2911937   | 2951208   | protein_coding | FLYWCH-type zinc finger 1                                       | 52.33                              | FLYWCH1         |
| ENS00000062822 | 29.62370708    | 66.68274823     | -1.341261835 | 0.96120321  | -1.170563175 | 33814  | 56.78 | 19        | 50384204  | 50418018  | protein_coding | DNA polymerase delta 1, catalytic subunit                       | 55.06                              | POLD1           |
| ENS00000063176 | 21.13079902    | 59.78918792     | -1.468350267 | 0.975527635 | -1.500532974 | 14126  | 56.78 | 19        | 48619291  | 48630717  | protein_coding | sphingosine kinase 2                                            | 56.78                              | SPHK2           |
| ENS00000063245 | 656.0051527    | 1251.672359     | -2.410375883 | 0.985134077 | -0.932077916 | 34632  | 54.85 | 19        | 55752226  | 55709858  | protein_coding | epsin 1                                                         | 54.85                              | EPN1            |
| ENS00000063660 | 1648.553148    | 3436.185947     | -1.612987458 | 1           | -1.05960771  | 32407  | 64.63 | 2         | 240435671 | 240668078 | protein_coding | glypican 1                                                      | 64.63                              | GPC1            |
| ENS00000065000 | 994.2949778    | 1450.765296     | -1.5856094   | 0.979006361 | -0.545068315 | 63477  | 56.41 | 19        | 2100988   | 2164465   | protein_coding | adaptor related protein complex 3 delta 1 subunit               | 56.41                              | AP3D1           |
| ENS00000065054 | 663.0991268    | 1768.324868     | -2.908076174 | 1           | -1.415086884 | 13670  | 64.6  | 16        | 2023556   | 2039026   | protein_coding | SLC9A3 regulator 2                                              | 64.6                               | SLC9A3R2        |
| ENS00000065268 | 92.69718257    | 220.5181927     | -1.492316537 | 0.976088812 | -1.250302823 | 14167  | 62.29 | 19        | 984271    | 989848    | protein_coding | WD repeat domain 18                                             | 62.29                              | WDR18           |
| ENS00000065717 | 297.6664143    | 494.5784323     | -1.345343641 | 0.961789323 | -0.732502876 | 49997  | 54.67 | 19        | 2997638   | 3047635   | protein_coding | transducin like enhancer of split 2                             | 54.67                              | TLE2            |
| ENS00000066056 | 413.7145913    | 753.3355745     | -1.522513064 | 0.9761188   | -0.864656818 | 22115  | 54.59 | 1         | 43300993  | 43323108  | protein_coding | tyrosine kinase with immunoglobulin like and EGF like domains 1 | 54.59                              | TIE1            |
| ENS00000066735 | 66.31505017    | 160.1152925     | -1.456475461 | 0.974716507 | -1.271702874 | 42171  | 63.77 | 14        | 104138723 | 104180894 | protein_coding | kinesin family member 26A                                       | 63.77                              | KIF26A          |
| ENS00000067057 | 2063.654869    | 312.414225      | -1.969806996 | 0.96758194  | -0.624919919 | 71379  | 51.45 | 10        | 3066333   | 3137712   | protein_coding | phosphofructokinase, beta                                       | 51.45                              | PFKB            |
| ENS00000068001 | 384.3130762    | 758.9606417     | -1.61378555  | 0.980638852 | -0.981743007 | 5116   | 61.05 | 3         | 50317790  | 50322906  | protein_coding | hyaluronoglucosaminidase 2                                      | 61.05                              | HYAL2           |
| ENS00000068137 | 110.0707846    | 107.5023417     | -1.582314809 | 0.978788333 | -1.383374684 | 9080   | 62    | 17        | 42667914  | 42676994  | protein_coding | pleckstrin homology, MyTH4 and FERM domain containing H3        | 62                                 | PLEKH3          |
| ENS00000068976 | 2361.094273    | 3206.867778     | -1.367883792 | 0.964364396 | -0.441709225 | 13908  | 56.99 | 11        | 64746389  | 64760297  | protein_coding | glycogen phosphorylase, muscle associated                       | 56.99                              | PYGM            |
| ENS00000070047 | 194.2533302    | 363.1438351     | -1.521322339 | 0.976111746 | -0.902601755 | 35736  | 56.21 | 11        | 576486    | 612222    | protein_coding | PHD and ring finger domains 1                                   | 56.21                              | PHF1            |
| ENS00000070182 | 1294.246016    | 1833.988152     | -1.275440975 | 0.95294983  | -0.502872441 | 133600 | 68.31 | 14        | 64746283  | 64879883  | protein_coding | spectrin beta, erythrocytic                                     | 48.21                              | SPTB            |
| ENS00000070413 | 977.3989562    | 1364.458661     | -1.35396302  | 0.962926157 | -0.481309217 | 86172  | 48.62 | 22        | 19036282  | 19122454  | protein_coding | DiGeorge syndrome critical region gene 2                        | 48.62                              | DGCR2           |
| ENS00000071564 | 113.4735382    | 213.4666356     | -1.223686777 | 0.950142665 | -0.911654924 | 43315  | 59.57 | 19        | 1609290   | 1652605   | protein_coding | transcription factor 3                                          | 59.57                              | TCF3            |
| ENS00000071655 | 157.1281018    | 392.9466151     | -1.904574828 | 0.988575582 | -1.3223921   | 19305  | 58.04 | 19        | 1573596   | 1592801   | protein_coding | methyl-CpG binding domain protein 3                             | 58.04                              | MBD3            |
| ENS00000071889 | 397.8662662    | 609.9614607     | -1.29509005  | 0.951538731 | -0.616434509 | 10083  | 55.32 | X         | 154506159 | 154516242 | protein_coding | family with sequence similarity 3 member A                      | 55.32                              | FAM3A           |
| ENS00000072163 | 1156.091788    | 2169.101473     | -2.582260168 | 0.996947272 | -0.907841601 | 43405  | 56.36 | 2         | 12763881  | 127681786 | protein_coding | LIM zinc finger domain containing 2                             | 56.36                              | LIMS2           |
| ENS00000072195 | 1245.590678    | 1805.9634       | -1.475104793 | 0.975803969 | -0.535938635 | NA     | NA    | NA        | NA        | NA        | NA             | NA                                                              | NA                                 | NA              |
| ENS00000072958 | 442.9212841    | 643.6532504     | -1.232105158 | 0.950486108 | -0.539233662 | 48329  | 51.59 | 19        | 16197578  | 16245907  | protein_coding | adaptor related protein complex 1 mu 1 subunit                  | 51.59                              | AP1M1           |
| ENS00000073169 | 53.71043841    | 124.5601931     | -1.386729726 | 0.965803466 | -1.213568683 | 16637  | 54.78 | 22        | 50200979  | 50217616  | protein_coding | selelenoprotein O                                               | 55.78                              | SELENOO         |

|                 |             |             |              |             |              |        |       |    |           |           |                |                                                                        |       |         |
|-----------------|-------------|-------------|--------------|-------------|--------------|--------|-------|----|-----------|-----------|----------------|------------------------------------------------------------------------|-------|---------|
| ENSG00000090013 | 705.5796127 | 1183.472149 | -1.708242454 | 0.978928147 | -0.746144974 | 18051  | 49.8  | 19 | 40447789  | 40465840  | protein_coding | biliverdin reductase B                                                 | 49.8  | BLVRB   |
| ENSG00000090238 | 286.0904636 | 550.7142087 | -1.456122657 | 0.974685888 | -0.944832423 | 4601   | 58.41 | 16 | 30092314  | 30096915  | protein_coding | yippee like 3                                                          | 58.41 | YPEL3   |
| ENSG00000090316 | 499.0677131 | 788.3571482 | -1.600272716 | 0.979912327 | -0.659613787 | 50296  | 55.03 | 0  | 1289851   | 1340147   | protein_coding | macrophage erythroblast attachment                                     | 55.03 | MAEA    |
| ENSG00000090372 | 427.3300314 | 784.5405873 | -1.857925951 | 0.985837684 | -0.876497377 | 27487  | 57.35 | 19 | 46719507  | 46746994  | protein_coding | striatin 4                                                             | 57.35 | STRN4   |
| ENSG00000090975 | 263.9266344 | 446.4594367 | -1.278375286 | 0.953259325 | -0.758392156 | 166535 | 51.35 | 12 | 12298340  | 123150015 | protein_coding | phosphatidylinositol transfer protein membrane associated 2            | 51.35 | PITPNM2 |
| ENSG00000091140 | 15163.67303 | 11236.12156 | 1.925538864  | 0.951353116 | 0.432475117  | 40760  | 36.67 | 7  | 107890970 | 107931730 | protein_coding | dihydroliipoamide dehydrogenase                                        | 36.67 | DLH2    |
| ENSG00000092054 | 395285.7725 | 488963.4154 | -1.683696801 | 0.979808776 | -0.306830496 | 22980  | 53.09 | 20 | 23412738  | 23435718  | protein_coding | myosin heavy chain 7                                                   | 53.09 | MYH7    |
| ENSG00000093010 | 328.8632259 | 605.7445666 | -1.529852039 | 0.976195392 | -0.881221865 | 28368  | 53.41 | 22 | 19941607  | 19969975  | protein_coding | catechol-O-methyltransferase                                           | 53.41 | COMT    |
| ENSG00000095066 | 410.2390997 | 649.9075265 | -1.247908329 | 0.950932578 | -0.663769455 | 109737 | 53.64 | 19 | 12763003  | 12827740  | protein_coding | hook microtubule tethering protein 2                                   | 53.64 | HOOK2   |
| ENSG00000095321 | 1285.637204 | 1755.667117 | -1.385218412 | 0.965686888 | -0.449535745 | 16379  | 58.45 | 9  | 129094810 | 129111189 | protein_coding | carnitine O-acetyltransferase                                          | 58.45 | CRAT    |
| ENSG00000095370 | 291.7793215 | 535.9706688 | -1.439340827 | 0.972727893 | -0.877274793 | 40424  | 53.99 | 9  | 127738317 | 127778784 | protein_coding | SH2 domain containing 3C                                               | 53.99 | SH2D3C  |
| ENSG00000095906 | 126.9741386 | 335.3836956 | -1.107353162 | 0.978940409 | -1.401277868 | 6290   | 62.18 | 16 | 1782901   | 1789191   | protein_coding | nucleotide binding protein 2                                           | 62.18 | NBP2    |
| ENSG00000099624 | 628.0792942 | 1727.60521  | -2.821149718 | 0.999896572 | -1.459754959 | 3080   | 62.97 | 19 | 1241746   | 1244826   | protein_coding | ATP synthase, H+ transporting, mitochondrial F1 complex, delta subunit | 62.97 | ATP5D   |
| ENSG00000099795 | 1217.846229 | 2881.427077 | -2.997080717 | 0.999992281 | -1.242451525 | 5984   | 57.48 | 19 | 14566078  | 14572062  | protein_coding | NADH:ubiquinone oxidoreductase subunit B7                              | 57.48 | NDUFB7  |
| ENSG00000099800 | 263.6229261 | 518.4507244 | -1.742404076 | 0.978792936 | -0.975731036 | 2270   | 64.99 | 19 | 2425624   | 2427894   | protein_coding | translocase of inner mitochondrial membrane 13                         | 64.99 | TIMM13  |
| ENSG00000099804 | 570.1972961 | 873.4644508 | -1.366654802 | 0.964256642 | -0.61528779  | 10380  | 64.75 | 19 | 531712    | 542092    | protein_coding | cell division cycle 34                                                 | 64.75 | CDC34   |
| ENSG00000099817 | 772.6409171 | 1340.849272 | -2.042876594 | 0.98907603  | -0.795277083 | 8801   | 61.47 | 19 | 1086579   | 1095380   | protein_coding | RNA polymerase II subunit E                                            | 61.47 | POLR2E  |
| ENSG00000099821 | 244.420264  | 501.5465871 | -1.781108514 | 0.98034661  | -1.037019816 | 16380  | 61.15 | 19 | 617224    | 636304    | protein_coding | RNA polymerase mitochondrial                                           | 61.15 | POLRM2  |
| ENSG00000099864 | 143.0473113 | 277.8316025 | -1.235281417 | 0.950574589 | -0.957718333 | 39390  | 59.66 | 19 | 708939    | 748329    | protein_coding | paralemmin                                                             | 59.66 | PALM    |
| ENSG00000099875 | 1307.924    | 2011.709732 | -1.867791222 | 0.986137582 | -0.621143443 | 13779  | 64.23 | 19 | 2037465   | 2052124   | protein_coding | MAP kinase interacting serine/threonine kinase 2                       | 64.23 | MINK2   |
| ENSG00000099889 | 154.9007749 | 329.7488253 | -1.458156929 | 0.974859247 | -1.090023159 | 46912  | 58.03 | 22 | 19969896  | 20016808  | protein_coding | ARVCF, delta catenin family member                                     | 58.03 | ARVCF   |
| ENSG00000099904 | 120.8617851 | 294.2114098 | -1.620630126 | 0.980960291 | -1.283495041 | 18551  | 63.57 | 20 | 20129456  | 20148007  | protein_coding | zinc finger DHHC-type containing 8                                     | 63.57 | ZDHHC8  |
| ENSG00000099917 | 306.4214442 | 521.8769618 | -1.42003628  | 0.969746793 | -0.768191251 | 91719  | 50.5  | 22 | 20495913  | 20587632  | protein_coding | mediator complex subunit 15                                            | 50.5  | MDM15   |
| ENSG00000099991 | 449.2043961 | 706.0649663 | -1.423812249 | 0.970342173 | -0.652428888 | 167436 | 50.24 | 22 | 24011192  | 24178628  | protein_coding | calcineurin binding protein 1                                          | 50.24 | CABIN1  |
| ENSG00000100034 | 386.7661149 | 654.1822776 | -1.451207084 | 0.974206106 | -0.758231272 | 33417  | 55.32 | 22 | 21919420  | 21952837  | protein_coding | protein phosphatase, Mg <sup>2+</sup> /Mn <sup>2+</sup> dependent 1F   | 55.32 | PPM1F   |
| ENSG00000100065 | 190.2692219 | 342.9432495 | -1.253630379 | 0.951184833 | -0.849927449 | 29180  | 57.09 | 22 | 37490362  | 37519542  | protein_coding | caspase recruitment domain family member 10                            | 57.09 | CARD10  |
| ENSG00000100097 | 3409.657823 | 5557.674045 | -2.296196493 | 0.99136163  | -0.704854259 | 4198   | 56.78 | 22 | 37657608  | 37679806  | protein_coding | galeactin 1                                                            | 56.78 | LGALS1  |
| ENSG00000100106 | 1137.910939 | 1748.909605 | -2.026498533 | 0.988121153 | -0.620068706 | 79552  | 54.35 | 22 | 37697004  | 37776556  | protein_coding | TRIO and F-actin binding protein                                       | 54.35 | TRIOBP  |
| ENSG00000100116 | 442.3150557 | 701.3820737 | -1.34978528  | 0.962395848 | -0.665126208 | 9271   | 54.21 | 22 | 37807905  | 38171716  | protein_coding | glycine C-acetyltransferase                                            | 54.21 | GCAT    |
| ENSG00000100239 | 698.2804907 | 1056.349632 | -1.549497778 | 0.976774856 | -0.597208848 | 101786 | 51.13 | 22 | 50343304  | 50445090  | protein_coding | protein phosphatase 6 regulatory subunit 1                             | 51.13 | PPP6R2  |
| ENSG00000100241 | 519.7597719 | 904.9423372 | -1.773908708 | 0.979669168 | -0.799980830 | 30024  | 60.67 | 22 | 50445000  | 50475024  | protein_coding | SET binding factor 2                                                   | 60.67 | SBF2    |
| ENSG00000100243 | 3484.31132  | 5190.799383 | -2.471253388 | 0.990111724 | -0.575083198 | 31728  | 55.99 | 22 | 42617840  | 42649568  | protein_coding | cytochrome b5 reductase 3                                              | 55.99 | CYB5R3  |
| ENSG00000100258 | 143.9583733 | 321.8177976 | -1.611324517 | 0.980514762 | -1.160592409 | 4742   | 67.15 | 22 | 50502949  | 50507691  | protein_coding | lipase maturation factor 2                                             | 67.15 | LMF2    |
| ENSG00000100263 | 76.06159486 | 150.7351631 | -1.358648352 | 0.963467428 | -0.98677591  | 8357   | 56.01 | 22 | 29259852  | 29268209  | protein_coding | rhomboid domain containing 3                                           | 56.01 | RHBD03  |
| ENSG00000100284 | 658.9363695 | 1042.064468 | -1.610234126 | 0.980458659 | -0.661233472 | 48719  | 53.51 | 22 | 29529725  | 35347994  | protein_coding | target of myb1 membrane trafficking protein                            | 53.51 | TM91    |
| ENSG00000100299 | 149.8511162 | 286.4962073 | -1.44224246  | 0.973511715 | -0.93498621  | 5419   | 61.2  | 22 | 50622754  | 50628173  | protein_coding | arylsulfatase A                                                        | 61.2  | ARSA    |
| ENSG00000100300 | 361.1808406 | 780.0074956 | -1.977661319 | 0.985488491 | -1.110766623 | 11728  | 57.81 | 22 | 4151514   | 41373242  | protein_coding | translocator protein                                                   | 57.81 | TSP2    |
| ENSG00000100345 | 3062.804849 | 4238.849817 | -1.598955057 | 0.979835834 | -0.468819406 | 106737 | 52.37 | 22 | 36281281  | 36388018  | protein_coding | myosin heavy chain 9                                                   | 52.37 | MYH9    |
| ENSG00000100359 | 329.7426745 | 543.2377205 | -1.293706403 | 0.954951847 | -0.720243049 | 39698  | 47.84 | 22 | 40370591  | 40410289  | protein_coding | small G protein signaling modulator 3                                  | 47.84 | SGSM3   |
| ENSG00000100399 | 38.58118069 | 128.5686966 | -1.895864935 | 0.988057644 | -1.736570225 | 11424  | 58.1  | 22 | 41229510  | 41240934  | protein_coding | chondroadherin like                                                    | 58.1  | CHAD15  |
| ENSG00000100403 | 1063.71753  | 1484.985442 | -1.474433072 | 0.975781053 | -0.481336694 | 58625  | 54.29 | 22 | 41303122  | 41360147  | protein_coding | zinc finger CCHC-type containing 7B                                    | 54.29 | ZCF7B   |
| ENSG00000100605 | 1171.563379 | 1711.374235 | -1.705326392 | 0.978973785 | -0.546727073 | 179406 | 53.85 | 22 | 49236914  | 93116320  | protein_coding | inositol-tetrakisphosphate 1-kinase                                    | 53.85 | ITPK1   |
| ENSG00000100726 | 105.4468192 | 270.0346696 | -1.77582437  | 0.979834722 | -1.356629069 | 47113  | 63.09 | 22 | 1493344   | 1510457   | protein_coding | telomere maintenance 2                                                 | 63.09 | TELO2   |
| ENSG00000100994 | 7379.617495 | 9789.673628 | -1.712666854 | 0.978882289 | -0.407714264 | 19945  | 52.17 | 20 | 25248709  | 25298014  | protein_coding | glycogen phosphorylase B                                               | 52.17 | PYGB    |
| ENSG00000101199 | 223.940983  | 395.782787  | -1.221808915 | 0.950031358 | -0.821590292 | 17008  | 59.72 | 20 | 63272785  | 63289793  | protein_coding | ADP ribosylation factor GTPase activating protein 1                    | 59.72 | ARFGAP1 |
| ENSG00000101210 | 10978.86546 | 15931.08743 | -3.04203563  | 0.99933123  | -0.537115771 | 11302  | 63.5  | 20 | 63488013  | 63499315  | protein_coding | eukaryotic translation elongation factor 1 alpha 2                     | 63.5  | EEF1A2  |
| ENSG00000101246 | 383.856809  | 660.3498898 | -1.705560216 | 0.978969454 | -0.782760737 | 9383   | 62.43 | 20 | 63698642  | 63708025  | protein_coding | ADP ribosylation factor related protein 1                              | 62.43 | ARFR1   |
| ENSG00000101335 | 19927.76173 | 24643.90356 | -1.524367869 | 0.976132568 | -0.306451118 | 9963   | 58.63 | 20 | 36541484  | 36551447  | protein_coding | myosin light chain 9                                                   | 58.63 | MYL9    |
| ENSG00000101400 | 3285.153559 | 5072.797873 | -2.781621892 | 0.99760947  | -0.626820869 | 35937  | 50.41 | 20 | 33407955  | 33443892  | protein_coding | syntrophin alpha 1                                                     | 50.41 | SNTA1   |
| ENSG00000101940 | 1075.882396 | 1617.531193 | -1.847308409 | 0.985731019 | -0.588273147 | 18825  | 51.72 | X  | 48590042  | 48608867  | protein_coding | WD repeat domain 13                                                    | 51.72 | WDR13   |
| ENSG00000101986 | 408.4200301 | 198.2049233 | -1.237344278 | 0.950627252 | -0.870361486 | 19894  | 58.36 | X  | 153724868 | 153744762 | protein_coding | ATP binding cassette subfamily D member 1                              | 58.36 | ABCD1   |
| ENSG00000102085 | 306.7197681 | 504.7535316 | -1.282184996 | 0.953672221 | -0.718657948 | 74481  | 55.34 | 16 | 4616493   | 4609974   | protein_coding | mahogunin ring finger 1                                                | 55.34 | MGRN1   |
| ENSG00000102096 | 1043.968943 | 1740.943912 | -1.68720797  | 0.979615916 | -0.737790931 | 21335  | 59.51 | 16 | 58025556  | 58046901  | protein_coding | matrix metalloproteinase 15                                            | 59.51 | MMP15   |
| ENSG00000103024 | 63.27630111 | 166.4212831 | -1.351463535 | 0.962614174 | -1.395102774 | 1444   | 69.2  | 16 | 1770286   | 1771730   | protein_coding | NME/NUM2 nucleoside diphosphate kinase 3                               | 69.2  | NME3    |
| ENSG00000103145 | 377.3275835 | 644.3192034 | -1.243114944 | 0.962614174 | -1.179580225 | 1666   | 63.71 | 16 | 3022620   | 3024286   | protein_coding | host cell factor C1 regulator 1                                        | 63.71 | HCF1C1  |
| ENSG00000103197 | 545.447812  | 862.0687277 | -1.459244424 | 0.974946934 | -0.660361724 | 41255  | 60.06 | 16 | 2047465   | 2088720   | protein_coding | TSC complex subunit 2                                                  | 60.06 | TSC2    |
| ENSG00000103245 | 177.3840713 | 337.9471071 | -1.349928512 | 0.962414883 | -0.899721925 | 11576  | 60.26 | 16 | 7297573   | 741329    | protein_coding | nuclear prelamins A recognition factor like                            | 60.26 | NARFL   |
| ENSG00000103254 | 19.45829532 | 49.1048661  | -1.555007595 | 0.977045119 | -1.335478909 | 2020   | 71.94 | 16 | 720581    | 722601    | protein_coding | family with sequence similarity 173 member A                           | 71.94 | FAM173A |
| ENSG00000103266 | 135.7947659 | 248.6104444 | -1.224581676 | 0.950189665 | -0.872450333 |        |       |    |           |           |                |                                                                        |       |         |

|                 |             |              |              |             |               |        |       |    |           |           |                |                                                             |       |          |
|-----------------|-------------|--------------|--------------|-------------|---------------|--------|-------|----|-----------|-----------|----------------|-------------------------------------------------------------|-------|----------|
| ENSG00000107281 | 135.6241264 | 293.4834099  | -1.400326047 | 0.967059286 | -1.113665107  | 6733   | 65.86 | 9  | 137039470 | 137046203 | protein_coding | neural proliferation, differentiation and control 1         | 65.86 | NPOC1    |
| ENSG00000107317 | 17168.71668 | 36561.56667  | -3.95627702  | 1           | -1.090545686  | 6650   | 66.35 | 9  | 136975092 | 136981742 | protein_coding | prostaglandin D2 synthase                                   | 66.35 | PTGDS    |
| ENSG00000107331 | 378.2807529 | 652.1422761  | -1.542249264 | 0.976490402 | -0.7852729374 | 21695  | 66.66 | 9  | 137007227 | 137028922 | protein_coding | ATP binding cassette subfamily A member 2                   | 66.66 | ABCA2    |
| ENSG00000107404 | 430.9735329 | 969.5206604  | -2.446700304 | 0.984166063 | -1.16967237   | 14074  | 66.25 | 1  | 1335276   | 1349350   | protein_coding | dishevelled segment polarity protein 1                      | 66.25 | DVL1     |
| ENSG00000107731 | 406.7827404 | 669.7005909  | -1.422854791 | 0.970190328 | -0.719257599  | 90294  | 54.37 | 10 | 71212570  | 71302864  | protein_coding | unc-5 netrin receptor B                                     | 54.37 | UNC5B    |
| ENSG00000107738 | 872.1495794 | 1380.134907  | -1.615857962 | 0.980740267 | -0.662161804  | 25939  | 53.85 | 10 | 71477559  | 71773498  | protein_coding | V-set immunoregulatory receptor                             | 53.85 | VSIR     |
| ENSG00000107816 | 358.3032849 | 656.9068184  | -1.620410206 | 0.980950578 | -0.874507477  | 11218  | 60.49 | 10 | 100996618 | 101007836 | protein_coding | leucine zipper tumor suppressor 2                           | 60.49 | LZTSL2   |
| ENSG00000108107 | 1556.689449 | 2222.9537963 | -1.496466577 | 0.976101825 | -0.513995371  | 17905  | 52.88 | 19 | 55385345  | 55403250  | protein_coding | ribosomal protein L28                                       | 52.88 | RPL28    |
| ENSG00000108262 | 406.5270778 | 648.6567763  | -1.299065699 | 0.95555407  | -0.674103857  | 20585  | 60.72 | 17 | 29573469  | 29594054  | protein_coding | Git ArfGAP 1                                                | 60.72 | GIT1     |
| ENSG00000108528 | 4137.016309 | 5335.187345  | -1.741425693 | 0.978795706 | -0.366948287  | 3121   | 58.68 | 17 | 4937130   | 4940251   | protein_coding | solute carrier family 25 member 11                          | 58.68 | SLC25A11 |
| ENSG00000108551 | 56.10627424 | 207.0236091  | -1.754147467 | 0.97882649  | -1.883561285  | 1958   | 62.89 | 17 | 17494437  | 17496395  | protein_coding | ras related dexamethasone induced 1                         | 62.89 | RASD1    |
| ENSG00000108557 | 233.4990585 | 473.8848155  | -1.744408865 | 0.978788838 | -1.021119702  | 129980 | 56.45 | 17 | 17681473  | 17811453  | protein_coding | retinoic acid induced 1                                     | 56.45 | RAI1     |
| ENSG00000108639 | 1389.104107 | 2163.383766  | -1.944266149 | 0.987549046 | -0.639134883  | 4969   | 62.13 | 17 | 17816558  | 178173527 | protein_coding | synaptogyrin 2                                              | 62.13 | SYNGR2   |
| ENSG00000108679 | 6102.670767 | 10405.14605  | -3.156877994 | 0.996349494 | -0.76978455   | 8871   | 58.85 | 17 | 78971238  | 78980109  | protein_coding | galectin 3 binding protein                                  | 58.85 | LGALS3BP |
| ENSG00000108821 | 566.5074055 | 1539.669788  | -1.624279979 | 0.981113008 | -1.442454251  | 18343  | 58.47 | 17 | 50183289  | 50201632  | protein_coding | collagen type I alpha 1 chain                               | 58.47 | COL1A1   |
| ENSG00000108823 | 1161.373228 | 2068.2747114 | -2.38751808  | 0.988489748 | -0.83259572   | 11717  | 55.92 | 17 | 50164214  | 50175931  | protein_coding | sarcoglycan alpha 5                                         | 55.92 | SGCA     |
| ENSG00000108840 | 1184.243174 | 1727.473955  | -1.583830788 | 0.978889259 | -0.544696063  | 46956  | 55.66 | 17 | 44076746  | 44123702  | protein_coding | histone deacetylase 5                                       | 55.66 | HDAC5    |
| ENSG00000109107 | 2766.138409 | 3631.480837  | -1.248381711 | 0.950950536 | -0.392684621  | 4149   | 56.05 | 17 | 28573115  | 28577264  | protein_coding | aldolase, fructose-bisphosphate C                           | 56.05 | ALDOC    |
| ENSG00000109332 | 5075.290691 | 3986.679077  | 2.251285806  | 0.963533704 | 0.348302981   | 74513  | 38.48 | 4  | 102794383 | 102868896 | protein_coding | ubiquitin conjugating enzyme E2 D3                          | 38.48 | UBE2D3   |
| ENSG00000109501 | 1008.752784 | 1529.878866  | -1.545802094 | 0.976619116 | -0.600844772  | 33416  | 57.04 | 4  | 6269849   | 6303265   | protein_coding | wubiquitin ER transmembrane glycoprotein                    | 57.04 | WUBF20   |
| ENSG00000109736 | 58.41042321 | 166.7444025  | -1.672261214 | 0.980509285 | -1.513340589  | 4298   | 67.55 | 4  | 2930561   | 2934859   | protein_coding | major facilitator superfamily domain containing 10          | 67.55 | MFSFD10  |
| ENSG00000110047 | 491.3181867 | 723.1430626  | -1.281809537 | 0.953631119 | -0.557623447  | 36654  | 54.84 | 11 | 64851642  | 64888296  | protein_coding | EH domain containing 1                                      | 54.84 | EHD1     |
| ENSG00000110237 | 1504.42486  | 2166.528615  | -1.89869505  | 0.988247791 | -0.52617324   | 60802  | 55.27 | 11 | 73308289  | 73369091  | protein_coding | Rho guanine nucleotide exchange factor 17                   | 55.27 | ARHGEF17 |
| ENSG00000110628 | 76.26248812 | 171.7025413  | -1.4585385   | 0.974890494 | -1.170865886  | 25525  | 63.48 | 11 | 2899721   | 2925246   | protein_coding | solute carrier family 22 member 18                          | 61.48 | SLC22A18 |
| ENSG00000110651 | 6475.891777 | 8811.256748  | -2.075534403 | 0.988076012 | -0.444268929  | 21242  | 64.41 | 11 | 2376177   | 2379719   | protein_coding | CD81 molecule                                               | 63.44 | CD81     |
| ENSG00000110697 | 232.3239106 | 500.5487698  | -1.847606081 | 0.985732597 | -1.107317111  | 14495  | 62.46 | 11 | 67491768  | 67506263  | protein_coding | phosphatidylinositol transfer protein membrane associated 1 | 62.46 | PITPNM1  |
| ENSG00000110717 | 1188.477634 | 2289.217848  | -2.427599472 | 0.983409967 | -0.945740006  | 6027   | 57.63 | 11 | 68030617  | 68036644  | protein_coding | NADH:ubiquinone oxidoreductase core subunit 58              | 57.63 | NDUFS8   |
| ENSG00000110799 | 5536.887357 | 7200.92606   | -1.417064654 | 0.969288159 | -0.379107281  | 175896 | 46.59 | 12 | 5948874   | 6124770   | protein_coding | von Willebrand factor                                       | 46.59 | VWF      |
| ENSG00000111077 | 1244.629782 | 1653.289414  | -1.885643193 | 0.987282793 | -0.722220318  | 17403  | 60.28 | 12 | 53046969  | 53064372  | protein_coding | tensin 2                                                    | 60.28 | TNS2     |
| ENSG00000111676 | 1004.156333 | 1071.016418  | -1.972309401 | 0.985651235 | -0.734742014  | 17858  | 55.53 | 12 | 6294463   | 6493221   | protein_coding | atrophin 1                                                  | 55.53 | ATN1     |
| ENSG00000111897 | 9016.856328 | 6967.77029   | 2.287139266  | 0.975260273 | 0.371927472   | 28468  | 55.93 | 6  | 122443354 | 122471822 | protein_coding | serine incorporator 1                                       | 55.93 | IRRC1    |
| ENSG00000112561 | 333.4564173 | 564.5778603  | -1.2940689   | 0.954985487 | -0.759674341  | 52281  | 54.14 | 6  | 41683978  | 41736259  | protein_coding | transcription factor EB                                     | 54.14 | TFEB     |
| ENSG00000112759 | 2912.756012 | 3920.113429  | -1.455357324 | 0.974615941 | -0.428510541  | 14646  | 56.86 | 6  | 44219505  | 44234151  | protein_coding | solute carrier family 29 member 1 (Augustine blood group)   | 56.86 | SLC29A1  |
| ENSG00000112787 | 258.1668161 | 530.964627   | -1.870302683 | 0.986255205 | -1.040312178  | 95637  | 62.75 | 12 | 132489551 | 132585188 | protein_coding | fibrosin like 1                                             | 62.75 | FBRSL1   |
| ENSG00000113140 | 8939.669642 | 11813.90574  | -1.44423239  | 0.973388856 | -0.402192582  | 26069  | 47.91 | 15 | 15661096  | 151687165 | protein_coding | secreted protein acid and cysteine rich 7                   | 47.91 | SPARC    |
| ENSG00000113504 | 2243.493737 | 3551.985797  | -2.246523358 | 0.981189798 | -0.66287866   | 61659  | 62.04 | 5  | 1050376   | 1112035   | protein_coding | solute carrier family 12 member 7                           | 62.04 | SLC12A7  |
| ENSG00000113558 | 4888.314299 | 3793.174991  | 2.178642742  | 0.972370006 | 0.365931118   | 28103  | 61.26 | 5  | 134148935 | 134177038 | protein_coding | 5-phase kinase associated protein 1                         | 61.26 | SKP1     |
| ENSG00000113758 | 188.0694143 | 331.7953297  | -1.253669089 | 0.951186868 | -0.819028337  | 17793  | 59.54 | 5  | 177456608 | 177474401 | protein_coding | drebrin 1                                                   | 59.54 | DBN1     |
| ENSG00000114353 | 2185.774808 | 3140.015786  | -2.184174339 | 0.986681336 | -0.522627039  | 33063  | 57.36 | 3  | 50226292  | 50259355  | protein_coding | G protein subunit alpha I2                                  | 57.36 | GNAI2    |
| ENSG00000114853 | 1357.598268 | 1902.251189  | -1.503588105 | 0.976101613 | -0.486651135  | 12170  | 62.11 | 3  | 46533684  | 42658584  | protein_coding | zinc finger and BTB domain containing 47                    | 62.11 | ZBTB47   |
| ENSG00000114867 | 4272.141894 | 5157.552135  | -1.304034595 | 0.956121958 | -0.271736052  | 20863  | 52.77 | 3  | 184314495 | 184335358 | protein_coding | eukaryotic translation initiation factor 4 gamma 1          | 52.77 | EIF4G1   |
| ENSG00000114923 | 4857.027159 | 8515.745957  | -3.621484274 | 1           | -0.810059358  | 14653  | 60.88 | 2  | 219627327 | 219641980 | protein_coding | solute carrier family 4 member 3                            | 60.88 | SLCA43   |
| ENSG00000115138 | 8.735083815 | 31.61742626  | -1.567992568 | 0.977825812 | -1.855826482  | 8050   | 51.16 | 2  | 25160853  | 251687165 | protein_coding | proopiomelanocortin                                         | 51.16 | POMC     |
| ENSG00000115266 | 14.82374981 | 31.95429263  | -1.264282652 | 0.951899326 | -1.108099314  | 26942  | 63.5  | 19 | 1446302   | 14473444  | protein_coding | APC2, WNT signaling pathway regulator                       | 63.5  | APC2     |
| ENSG00000115268 | 802.0840602 | 1308.032137  | -1.520362814 | 0.976106856 | -0.705572639  | 2136   | 62.7  | 19 | 1438358   | 1430494   | protein_coding | ribosomal protein S15                                       | 62.7  | RPS15    |
| ENSG00000115286 | 89.97727487 | 211.5457577  | -1.330302258 | 0.959576047 | -1.233337176  | 12062  | 59.57 | 19 | 1383527   | 1395589   | protein_coding | NADH:ubiquinone oxidoreductase core subunit 57              | 59.57 | NDUFS7   |
| ENSG00000115457 | 390.0995062 | 733.5298989  | -1.435100672 | 0.972108923 | -0.911013582  | 31608  | 50.33 | 2  | 216632828 | 216664436 | protein_coding | insulin like growth factor binding protein 2                | 50.33 | IGFBP2   |
| ENSG00000115461 | 7388.858571 | 10421.44604  | -1.7242419   | 0.978840451 | -0.496132054  | 23420  | 50.77 | 2  | 216672105 | 216695525 | protein_coding | insulin like growth factor binding protein 5                | 50.77 | IGFBP5   |
| ENSG00000115648 | 663.8335109 | 948.6443814  | -1.253181627 | 0.951161643 | -0.515045905  | 69890  | 51.32 | 2  | 237485428 | 237555318 | protein_coding | melanophilin                                                | 51.32 | MLPH     |
| ENSG00000116685 | 731.2474121 | 1002.274428  | -1.235388512 | 0.950577409 | -0.454845773  | 5043   | NA    | NA | NA        | NA        | NA             | NA                                                          | NA    | NA       |
| ENSG00000116786 | 1108.075767 | 1755.724956  | -1.979269352 | 0.985459619 | -0.663222557  | 5037   | 52    | 1  | 15684332  | 15734769  | protein_coding | pleckstrin homology and RUN domain containing M2            | 52    | PLEKHM2  |
| ENSG00000116809 | 163.475674  | 277.0764282  | -1.234786366 | 0.95056157  | -0.761208009  | 34263  | 51.22 | 1  | 15941869  | 15976132  | protein_coding | zinc finger and BTB domain containing 17                    | 51.22 | ZBTB17   |
| ENSG00000116871 | 3631.6337   | 4714.160314  | -1.702584779 | 0.979029802 | -0.376382127  | 25270  | 54.66 | 1  | 36155579  | 36180849  | protein_coding | MAP7 domain containing 1                                    | 54.66 | MAP7D1   |
| ENSG00000117266 | 3367.562724 | 4910.319798  | -2.365411753 | 0.991593631 | -0.544112127  | 28198  | 55.71 | 1  | 20550450  | 205532793 | protein_coding | cyclin dependent kinase 18                                  | 55.71 | CDK18    |
| ENSG00000117984 | 1421.389155 | 3074.474262  | -3.307551381 | 1           | -1.113038038  | 11821  | 64.73 | 11 | 1752752   | 1764573   | protein_coding | cathepsin D                                                 | 64.73 | CTSD     |
| ENSG00000118046 | 460.7436156 | 764.0512146  | -1.542746367 | 0.976506955 | -0.729705115  | 50877  | 57.49 | 19 | 1177558   | 1228435   | protein_coding | serine/threonine kinase 11                                  | 57.49 | STK11    |
| ENSG00000118194 | 102274.5069 | 120402.0445  | -1.464531747 | 0.97531588  | -0.235413308  | 18754  | 54.6  | 1  | 201359600 | 201377762 | protein_coding | trionin T2, cardiac type                                    | 54.6  | TNNT2    |
| ENSG00000119242 | 665.138042  | 955.075351   | -1.279647015 | 0.953395978 | -0.52193808   | 54171  | 47.49 | 12 | 123918608 | 123978317 | protein_coding | colled-col domain containing 92                             | 47.49 | CCDC92   |
| ENSG00000119431 | 149.366954  | 318.1675048  | -1.700113929 | 0.979092428 | -1.090925496  | 3580   | 54.87 | 9  | 113       |           |                |                                                             |       |          |



|                 |             |              |              |             |              |              |        |       |           |           |                |                                                                  |                                 |          |        |
|-----------------|-------------|--------------|--------------|-------------|--------------|--------------|--------|-------|-----------|-----------|----------------|------------------------------------------------------------------|---------------------------------|----------|--------|
| ENSG00000127220 | 34.94785351 | 83.90365436  | -1.515554165 | 0.976093514 | -1.263529799 | 18105        | 54.9   | 19    | 17292131  | 17310236  | protein_coding | abhydrolase domain containing 8                                  | 54.9                            | ABHD8    |        |
| ENSG00000127445 | 461.2055591 | 717.8053097  | -1.300227373 | 0.955685718 | -0.638182693 | 14425        | 56.31  | 19    | 9832557   | 9846982   | protein_coding | peptidylprolyl cis/trans isomerase, NIMA-interacting 1           | 56.31                           | PIN1     |        |
| ENSG00000127533 | 8.931264348 | 50.66812144  | -1.396630073 | 0.966672583 | -2.504142112 | 3746         | 61.46  | 19    | 16888860  | 16892606  | protein_coding | F2R like thrombin or trypsin receptor 3                          | 61.46                           | F2RL3    |        |
| ENSG00000127580 | 26.96030407 | 73.1324599   | -1.541311036 | 0.976459486 | -1.439671203 | 5822         | 63.87  | 16    | 684622    | 900444    | protein_coding | WD repeat domain 24                                              | 63.87                           | WOR24    |        |
| ENSG00000127663 | 295.6836772 | 493.3483108  | -1.332650065 | 0.959924192 | -0.738551965 | 184482       | 57.26  | 19    | 4969113   | 5153595   | protein_coding | lysine demethylase 4B                                            | 57.26                           | KDM4B    |        |
| ENSG00000128185 | 347.1704933 | 558.2694776  | -1.353172216 | 0.962829813 | -0.685317346 | 5804         | 57.23  | 22    | 20314272  | 20320080  | protein_coding | DiGeorge syndrome critical region gene 6 like                    | 57.23                           | DGCR6L   |        |
| ENSG00000128274 | 434.7639542 | 724.1864346  | -1.233015962 | 0.950513014 | -0.73612882  | 29177        | 52.39  | 22    | 42692121  | 42721298  | protein_coding | alpha 1,4-galactosyltransferase (P blood group)                  | 52.39                           | A4GALT   |        |
| ENSG00000128283 | 98.39594994 | 232.7142251  | -1.850158755 | 0.985747571 | -1.241888561 | 8958         | 58.87  | 22    | 37560447  | 37569405  | protein_coding | CDCA4 effector protein 1                                         | 58.87                           | CDCA2EP2 |        |
| ENSG00000128309 | 253.4236141 | 451.3773621  | -1.379688739 | 0.965277287 | -0.832783102 | 10187        | 55.28  | 22    | 37019635  | 37029822  | protein_coding | mercaptopyruvate sulfurtransferase                               | 55.28                           | MPST     |        |
| ENSG00000128311 | 486.5514106 | 827.8364237  | -1.513552937 | 0.976091996 | -0.766753474 | 9324         | 57.04  | 22    | 37010859  | 37020183  | protein_coding | thiosulfate sulfurtransferase                                    | 57.04                           | TST      |        |
| ENSG00000128591 | 25774.36861 | 36944.90646  | -1.455189521 | 0.974600498 | -0.519438389 | 28897        | 60.86  | 7     | 128830377 | 128859274 | protein_coding | filamin C                                                        | 60.86                           | FLNC     |        |
| ENSG00000128609 | 8053.502845 | 6060.828295  | 2.866477277  | 0.990996654 | 0.410101444  | 21258        | 35.76  | 7     | 123536997 | 123558255 | protein_coding | NADH:ubiquinone oxidoreductase subunit A5                        | 35.76                           | NDUFA5   |        |
| ENSG00000128626 | 309.6755248 | 526.3040597  | -1.435254868 | 0.972132259 | -0.765139159 | 2614         | 55.6   | 19    | 38930548  | 38933162  | protein_coding | mitochondrial ribosomal protein S12                              | 55.6                            | MRPS12   |        |
| ENSG00000129295 | 255.1612965 | 501.3448043  | -1.721554711 | 0.978845096 | -0.974393761 | 16340        | 61.61  | 16    | 370773    | 387113    | protein_coding | transmembrane protein 8A                                         | 61.61                           | TMEM8A   |        |
| ENSG00000129932 | 27.21970268 | 72.31325134  | -1.550940153 | 0.976841329 | -1.409608736 | 10118        | 56.59  | 19    | 3490822   | 3500940   | protein_coding | deoxyhypusine hydroxylase                                        | 56.59                           | DOHH     |        |
| ENSG00000129946 | 76.50081908 | 188.8758397  | -1.483373608 | 0.975999708 | -1.30389107  | 44413        | 58.69  | 19    | 416583    | 460996    | protein_coding | SHC adaptor protein 2                                            | 58.69                           | SHC2     |        |
| ENSG00000129968 | 117.6161333 | 342.5852664  | -2.072578941 | 0.988231607 | -1.54237714  | 8737         | 65.16  | 19    | 1876810   | 1885547   | protein_coding | abhydrolase domain containing 17A                                | 65.16                           | ABHD17A  |        |
| ENSG00000130158 | 367.5449179 | 663.283315   | -1.508648928 | 0.976094978 | -0.851704662 | 63186        | 53.76  | 19    | 11199295  | 11262481  | protein_coding | dedicator of cytokinesis 6                                       | 53.76                           | DOCK6    |        |
| ENSG00000130159 | 1681.157727 | 2397.748442  | -1.871894679 | 0.986339064 | -0.512252222 | 23258        | 50.87  | 19    | 11505916  | 11529174  | protein_coding | ECST1 signalling integrator                                      | 50.87                           | ECST1    |        |
| ENSG00000130202 | 286.2533519 | 500.4463851  | -1.499340517 | 0.976104214 | -0.889914351 | 43053        | 52.84  | 19    | 44846175  | 44898228  | protein_coding | nectin cell adhesion molecule 2                                  | 52.84                           | NPC2IN2  |        |
| ENSG00000130203 | 114.9878758 | 301.9829542  | -1.593903611 | 0.979533422 | -1.435353511 | 3639         | 60.96  | 19    | 44905574  | 44909393  | protein_coding | apolipoprotein E                                                 | 60.96                           | APOE     |        |
| ENSG00000130222 | 63.9858186  | 251.3046394  | -1.847494947 | 0.985732008 | -1.973613361 | 1542         | 66.23  | 19    | 89650153  | 89606555  | protein_coding | growth arrest and DNA damage inducible gamma                     | 66.23                           | GADD45G  |        |
| ENSG00000130255 | 915.5014432 | 1504.370424  | -1.574077618 | 0.978232224 | -0.716255782 | 16929        | 58.81  | 19    | 5674947   | 5691876   | protein_coding | ribosomal protein L36                                            | 58.81                           | RPL36    |        |
| ENSG00000130303 | 408.393756  | 654.7175565  | -1.321457495 | 0.958310082 | -0.680911857 | 2709         | 58.38  | 19    | 17402939  | 17405648  | protein_coding | bone marrow stromal cell antigen 2                               | 58.38                           | BST2     |        |
| ENSG00000130304 | 525.562828  | 912.2469513  | -1.856216857 | 0.985809385 | -0.795561184 | 37399        | 53.88  | 19    | 17468769  | 17501668  | protein_coding | solute carrier family 27 member 1                                | 53.88                           | SLC27A1  |        |
| ENSG00000130312 | 624.4200277 | 1019.2888787 | -1.60400076  | 0.980123369 | -0.70697414  | 14234        | 54.25  | 19    | 17292609  | 17306843  | protein_coding | mitochondrial ribosomal protein L34                              | 54.25                           | MRPL34   |        |
| ENSG00000130382 | 376.7224025 | 589.910905   | -1.293690419 | 0.954950059 | -0.69597925  | 69569        | 55.57  | 19    | 6210379   | 6279948   | protein_coding | MLLT1, super elongation complex subunit                          | 55.57                           | MRL31    |        |
| ENSG00000130402 | 1066.46622  | 1582.697575  | -1.542475907 | 0.976497888 | -0.56954734  | 83934        | 53.01  | 19    | 38647649  | 38731583  | protein_coding | actinin alpha 4                                                  | 53.01                           | ACTN4    |        |
| ENSG00000130508 | 509.3974956 | 866.858277   | -1.306992769 | 0.956468019 | -0.767004186 | 112965       | 49.9   | 2     | 1631887   | 1744852   | protein_coding | peroxidase                                                       | 49.9                            | PXDN     |        |
| ENSG00000130511 | 41.47525006 | 107.5050111  | -1.477560385 | 0.975876135 | -1.374081258 | 15698        | 64.53  | 19    | 18418864  | 18434562  | protein_coding | single stranded DNA binding protein 4                            | 64.53                           | SSBP4    |        |
| ENSG00000130529 | 253.2029538 | 435.3878647  | -1.227619006 | 0.950329228 | -0.782006961 | 54095        | 50.3   | 19    | 49157741  | 49211836  | protein_coding | transient receptor potential cation channel subfamily M member 4 | 50.3                            | TRPM4    |        |
| ENSG00000130560 | 1489.103805 | 1983.998412  | -1.572462203 | 0.978123245 | -0.413966543 | 28411        | 51.82  | 9     | 135932969 | 135961380 | protein_coding | UBA domain containing 1                                          | 51.82                           | UBAC2    |        |
| ENSG00000130589 | 80.93846184 | 186.7682421  | -1.28038276  | 0.953475686 | -1.206351824 | 16153        | 66.08  | 20    | 6358086   | 63574239  | protein_coding | helicase with zinc finger 2                                      | 66.08                           | HELIC2   |        |
| ENSG00000130590 | 37.02486631 | 77.32810035  | -1.230014994 | 0.950419396 | -1.062498162 | 5895         | 61.55  | 20    | 63974113  | 63980008  | protein_coding | sterile alpha motif domain containing 10                         | 61.55                           | SAMD10   |        |
| ENSG00000130600 | 2445.207663 | 5781.744246  | -2.340105737 | 0.993751842 | -1.241547818 | NA           | NA     | NA    | NA        | NA        | NA             | NA                                                               | NA                              | NA       |        |
| ENSG00000130653 | 138.7356812 | 273.2400778  | -1.342147382 | 0.961331996 | -0.977830229 | 90581        | 54.81  | 9     | 134759953 | 137305534 | protein_coding | patatin like phospholipase domain containing 9                   | 54.81                           | PNPLA7   |        |
| ENSG00000130702 | 306.3136444 | 370.9215127  | -1.991396607 | 0.985548843 | -1.353858054 | 59357        | 61.89  | 20    | 62307955  | 62367312  | protein_coding | linamin subunit alpha 5                                          | 61.89                           | LMAL5    |        |
| ENSG00000130723 | 1503.371811 | 2107.405775  | -1.386643886 | 0.965796806 | -0.487266227 | 106104       | 49.02  | 9     | 131394093 | 131500197 | protein_coding | proline rich coiled-coil 2B                                      | 49.02                           | PRRC2B   |        |
| ENSG00000130726 | 1066.085613 | 1652.242054  | -1.850145487 | 0.98574748  | -0.632101759 | 6631         | 59.23  | 19    | 58544091  | 58550722  | protein_coding | tripartite motif containing 28                                   | 59.23                           | TRIM28   |        |
| ENSG00000130734 | 276.7235942 | 469.593663   | -1.447354349 | 0.973774    | -0.762967283 | 9523         | 55.3   | 19    | 10543895  | 10553418  | protein_coding | autophagy related 4D cysteine peptidase                          | 55.3                            | ATG4D    |        |
| ENSG00000130758 | 84.62061136 | 179.1771703  | -1.473516263 | 0.97574938  | -1.082305815 | 23831        | 52.96  | 19    | 40191744  | 40215575  | protein_coding | mitogen-activated protein kinase kinase kinase 10                | 52.96                           | MAP3K10  |        |
| ENSG00000130787 | 194.2286889 | 390.9144502  | -1.508215439 | 0.976095528 | -1.009096022 | 28507        | 59.16  | 12    | 122834453 | 122862960 | protein_coding | huntingtin interacting protein 1 related                         | 59.16                           | HIP1R    |        |
| ENSG00000130821 | 2656.111419 | 3371.489486  | -1.397831325 | 0.966794213 | -0.344076432 | 8494         | 64.7 X | 12    | 15688809  | 153696593 | protein_coding | solute carrier family 6 member 8                                 | 64.7                            | SLCGA8   |        |
| ENSG00000130881 | 98.76319702 | 205.7702355  | -1.365624629 | 0.964163892 | -1.05898887  | 31264        | 54.69  | 19    | 33177603  | 33208867  | protein_coding | LDL receptor related protein 3                                   | 54.69                           | LRP3     |        |
| ENSG00000131408 | 540.4405443 | 1064.537643  | -2.153319152 | 0.988828972 | -0.936778245 | 53329        | 51.27  | 19    | 50329653  | 50382982  | protein_coding | nuclear receptor subfamily 1 group H member 2                    | 51.27                           | NR1H2    |        |
| ENSG00000131584 | 239.42706   | 452.1688676  | -1.313231213 | 0.95722758  | -0.91277545  | 17233        | 67.3   | 1     | 1292376   | 1309609   | protein_coding | ArfGAP with coiled-coil, ankyrin repeat and PH domains 3         | 67.3                            | ACAP3    |        |
| ENSG00000131669 | 385.0485261 | 594.3101351  | -1.24987457  | 0.951010037 | -0.62617571  | 12799        | 59.68  | 9     | 93121489  | 93134288  | protein_coding | ninjurin 1                                                       | 59.68                           | NIN1     |        |
| ENSG00000131899 | 187.6832585 | 314.2546689  | -1.293516709 | 0.954930631 | -0.743634305 | 19288        | 59.89  | 17    | 18225587  | 18248475  | protein_coding | LLGL1, scribble cell polarity complex component                  | 59.89                           | LLGL1    |        |
| ENSG00000132024 | 201.6962611 | 345.7333149  | -1.315404589 | 0.957503979 | -0.77475288  | 24678        | 53.88  | 19    | 13906201  | 13930879  | protein_coding | coiled-coil and C2 domain containing 1A                          | 53.88                           | CC2D1A   |        |
| ENSG00000132153 | 841.6762918 | 1168.38377   | -1.30036094  | 0.955700897 | -0.473176838 | 47286        | 50.33  | 3     | 47802909  | 47850195  | protein_coding | DExH-box helicase 30                                             | 50.33                           | DHX30    |        |
| ENSG00000132329 | 586.3693107 | 1030.682455  | -2.022448804 | 0.987774124 | -1.157133075 | 53221        | 52.41  | 2     | 237858893 | 237912114 | protein_coding | receptor activity modifying protein 1                            | 52.41                           | RAMP1    |        |
| ENSG00000132361 | 1634.264807 | 3033.428563  | -1.632242475 | 0.982356485 | 1            | -0.892307657 | 62377  | 62.54 | 17        | 2689386   | 2712663        | protein_coding                                                   | clustered mitochondrial homolog | 62.54    | CLUMP1 |
| ENSG00000132471 | 2319.41167  | 3040.782894  | -1.568363687 | 0.977850198 | -0.390683909 | 10808        | 55.96  | 17    | 75845699  | 75856507  | protein_coding | VW domain binding protein 2                                      | 55.96                           | WBPD     |        |
| ENSG00000132819 | 403.7440359 | 669.2596815  | -1.415583912 | 0.969064529 | -0.729125156 | 19296        | 59.07  | 20    | 57391407  | 57395033  | protein_coding | RNA binding motif protein 38                                     | 59.07                           | RBM38    |        |
| ENSG00000133243 | 212.7138909 | 529.7328716  | -2.068272866 | 0.988474088 | -1.316359086 | 49443        | 55.3   | 19    | 1985438   | 2034881   | protein_coding | BTB domain containing 2                                          | 55.3                            | BTBD2    |        |
| ENSG00000133250 | 27.04917829 | 62.77821176  | -1.381316308 | 0.965396201 | -1.214679166 | 4486         | 62.76  | 19    | 8509678   | 8541464   | protein_coding | zinc finger protein 414                                          | 62.76                           | ZNF414   |        |
| ENSG00000133265 | 160.4781261 | 313.5732074  | -1.498589043 | 0.976104121 | -0.966421941 | 18150        | 51.91  | 19    | 55622321  | 55280381  | protein_coding | HSPA (Hsp70) binding protein 1                                   | 51.91                           | HSPB1    |        |
| ENSG00000133275 | 125.7973015 | 283.8564891  | -1.721942121 | 0.978844314 | -1.174067407 | 40189        | 61.03  | 19    | 1941149   | 1981338   | protein_coding | casein kinase 1 gamma 2                                          | 61.03                           | CKNK1G2  |        |
| ENSG00000133315 | 532.8946887 | 865.6607997  | -1.588558709 | 0.979197787 | -0.699951377 | 167548       |        |       |           |           |                |                                                                  |                                 |          |        |

|                |             |             |              |             |              |        |       |    |           |           |                |                                                                |       |          |
|----------------|-------------|-------------|--------------|-------------|--------------|--------|-------|----|-----------|-----------|----------------|----------------------------------------------------------------|-------|----------|
| ENS00000142459 | 211.5131094 | 350.4321351 | -1.267722318 | 0.952195777 | -0.728387995 | 34743  | 58.04 | 19 | 7830233   | 7864976   | protein_coding | ecotropic viral integration site 5 like                        | 58.04 | EV15L    |
| ENS00000142634 | 144.2188861 | 277.419937  | -1.3189516   | 0.957969801 | -0.943811368 | 20448  | 56.77 | 1  | 15409895  | 15430343  | protein_coding | EF-hand domain family member D2                                | 56.77 | EFHD2    |
| ENS00000142694 | 5.523855615 | 21.51610371 | -1.869172008 | 0.98620043  | -1.961669332 | 2123   | 70.2  | 1  | 36322031  | 36324154  | protein_coding | eva-11 homolog B                                               | 70.2  | EV1A18   |
| ENS00000142798 | 1632.070632 | 3778.780053 | -3.388824075 | 1           | -1.212117053 | 115052 | 56.09 | 1  | 21822245  | 21932797  | protein_coding | heparan sulfate proteoglycan 2                                 | 56.09 | HSPG2    |
| ENS00000142910 | 2175.426061 | 2875.902372 | -1.32308008  | 0.958535204 | -0.402716719 | 11201  | 55.48 | 1  | 31576485  | 31587686  | protein_coding | tubulointerstitial nephritis antigen like 1                    | 55.48 | TINAG1   |
| ENS00000143382 | 282.2470442 | 483.9848346 | -1.324738097 | 0.958768916 | -0.778003369 | 11568  | 60.13 | 1  | 150549369 | 150560937 | protein_coding | ADAMTS like 4                                                  | 60.13 | ADAMTS4  |
| ENS00000143434 | 890.6096599 | 1346.588512 | -1.360950838 | 0.963711516 | -0.596443912 | 14979  | 57.48 | 1  | 151131685 | 151146664 | protein_coding | semaphorin 6C                                                  | 57.48 | SEMAP6C  |
| ENS00000143537 | 974.2932528 | 1427.987074 | -1.526600678 | 0.976153685 | -0.551554938 | 12209  | 59.25 | 1  | 150500566 | 150562775 | protein_coding | ADAM metallopeptidase domain 15                                | 58.25 | ADAM15   |
| ENS00000143742 | 4062.901893 | 2767.222037 | -2.230581283 | 0.965526517 | 0.554071212  | 12653  | 40.6  | 1  | 225777813 | 225790466 | protein_coding | signal recognition particle 9                                  | 40.6  | SRP9     |
| ENS00000143761 | 5389.075023 | 6550.96727  | -2.045402813 | 0.989130275 | -0.281656948 | 16552  | 52.33 | 1  | 128082660 | 128099212 | protein_coding | ADP ribosylation factor 1                                      | 52.33 | ARF1     |
| ENS00000143774 | 855.0107076 | 1535.385675 | -1.892287436 | 0.987796984 | -0.8445867   | 9022   | 61.76 | 1  | 228139962 | 228148984 | protein_coding | guanylate kinase 1                                             | 61.76 | GUK1     |
| ENS00000144230 | 45.23030266 | 150.563839  | -1.400885942 | 0.967121936 | -1.735013764 | 6775   | 59.4  | 1  | 127645864 | 127652639 | protein_coding | G protein-coupled receptor 17                                  | 59.4  | GPCR17   |
| ENS00000144579 | 1180.638265 | 1625.794722 | -1.566284011 | 0.977714595 | -0.461578104 | 7685   | 63.19 | 2  | 218398256 | 218405941 | protein_coding | CTD small phosphatase 1                                        | 63.19 | CTSP1    |
| ENS00000144711 | 1364.739461 | 1881.705728 | -1.535650134 | 0.976304482 | -0.463415472 | 175897 | 54.36 | 1  | 32897220  | 13073117  | protein_coding | IQ motif and Sec7 domain 1                                     | 54.36 | IQSFP1   |
| ENS00000144712 | 1019.722494 | 1415.860331 | -1.293109457 | 0.954885134 | -0.473502363 | 75444  | 50.87 | 3  | 12796472  | 12871916  | protein_coding | cullin associated and neddylation dissociated 2 (putative)     | 50.87 | CAND2    |
| ENS00000144746 | 8867.816004 | 6859.499572 | 2.690421475  | 1           | 0.370475506  | 21122  | 42.5  | 3  | 69084944  | 69106066  | protein_coding | ADP ribosylation factor like GTPase 6 interacting protein 5    | 42.5  | ARL6IP5  |
| ENS00000145214 | 41.54283442 | 105.8216837 | -1.526424393 | 0.976151823 | -1.34896372  | 28008  | 60.54 | 4  | 958887    | 986895    | protein_coding | diacylglycerol kinase theta                                    | 60.54 | DGKQ     |
| ENS00000145384 | 3.02733805  | 18.82135357 | -1.449666469 | 0.974016663 | -2.636248697 | 5140   | 32.06 | 4  | 119317250 | 119322390 | protein_coding | fatty acid binding protein 2                                   | 32.06 | FABP2    |
| ENS00000145494 | 1364.968252 | 1842.173414 | -1.343921504 | 0.961587724 | -0.432541881 | 15205  | 48.37 | 5  | 1804400   | 1816605   | protein_coding | NADH:ubiquinone oxidoreductase subunit S6                      | 48.37 | UOFS6    |
| ENS00000146540 | 389.5033434 | 778.2295427 | -1.715280212 | 0.978865655 | -0.998560036 | 141274 | 57.69 | 7  | 969686    | 1138260   | protein_coding | chromosome 7 open reading frame 50                             | 57.69 | C7orf50  |
| ENS00000146674 | 1857.873138 | 2915.11817  | -1.249842012 | 0.951008701 | -0.649902374 | 9629   | 49.16 | 7  | 45912425  | 45921874  | protein_coding | insulin like growth factor binding protein 3                   | 49.16 | IGFBP3   |
| ENS00000146729 | 14270.79657 | 11230.7012  | 2.350332426  | 0.977529353 | 0.345617589  | 48388  | 45.28 | 7  | 50951793  | 50600181  | protein_coding | nipsnap homolog 2                                              | 45.28 | NIPSNAP2 |
| ENS00000146830 | 339.097106  | 561.561499  | -1.296416089 | 0.955255535 | -0.727746584 | 9941   | 62.01 | 7  | 106679507 | 106689448 | protein_coding | GRB10 interacting GYF protein 1                                | 62.01 | GYF1     |
| ENS00000146926 | 154.46346   | 367.177626  | -1.730574249 | 0.978828974 | -1.249213094 | 12134  | 53.7  | 7  | 15175698  | 15187832  | protein_coding | ankyrin repeat and SOCS box containing 10                      | 53.7  | ASB10    |
| ENS00000148334 | 1059.453646 | 1599.81633  | -1.735959692 | 0.978813669 | -0.587353415 | 7769   | 59.55 | 9  | 128120693 | 128128462 | protein_coding | prostaglandin E synthase 2                                     | 59.55 | PTGES2   |
| ENS00000148343 | 569.2874442 | 876.4948893 | -1.446437673 | 0.973663475 | -0.622584813 | 35461  | 53.65 | 9  | 129036621 | 129072082 | protein_coding | nitroguardin 2                                                 | 53.65 | MIGA2    |
| ENS00000148400 | 158.8588605 | 350.0082302 | -1.555256628 | 0.977058344 | -1.139642817 | 51418  | 63.39 | 9  | 136494444 | 136545862 | protein_coding | notch 1                                                        | 63.39 | NOTCH1   |
| ENS00000149091 | 315.9232371 | 516.7726162 | -1.304799599 | 0.956210676 | -0.709955568 | 47649  | 56.98 | 11 | 46332905  | 46380554  | protein_coding | diacylglycerol kinase zeta                                     | 56.98 | DGKZ     |
| ENS00000149564 | 953.7317283 | 1450.339049 | -1.397822518 | 0.966793303 | -0.559262816 | 9707   | 54.05 | 11 | 124752583 | 124762290 | protein_coding | endothelial cell adhesion molecule 2                           | 54.05 | ESAM2    |
| ENS00000149761 | 86.29403658 | 250.0057078 | -1.85012387  | 0.985747331 | -1.534628616 | 4745   | 59.06 | 11 | 64225941  | 64230866  | protein_coding | nudix hydrolase 22                                             | 59.06 | NUDT22   |
| ENS00000149809 | 979.3701909 | 1521.56542  | -1.385942562 | 0.965742461 | -0.635630173 | 4539   | 60.18 | 11 | 65111845  | 65116384  | protein_coding | transmembrane 7 superfamily member 2                           | 60.18 | TM7SF2   |
| ENS00000149823 | 393.7756988 | 716.81149   | -1.678266734 | 0.980134932 | -0.864219682 | 22536  | 50.69 | 11 | 65089324  | 65111860  | protein_coding | VPS51, GARP complex subunit                                    | 50.69 | VPS51    |
| ENS00000149925 | 29433.8885  | 42239.32097 | -3.262118189 | 0.999999884 | -0.521108494 | 13762  | 54.16 | 16 | 30053090  | 30070457  | protein_coding | aldolase, fructose-bisphosphate A                              | 54.16 | ALDOA    |
| ENS00000149930 | 560.0598435 | 856.5988335 | -1.48581802  | 0.976034477 | -0.613038429 | 18620  | 55.43 | 16 | 29973641  | 29992251  | protein_coding | TAO kinase 2                                                   | 55.43 | TAOK2    |
| ENS00000151640 | 449.9489786 | 912.4199685 | -1.740543162 | 0.978798375 | -1.019788939 | 18876  | 61.49 | 10 | 132186900 | 132205776 | protein_coding | dihydropyrimidinease like 4                                    | 61.49 | DPYS4L   |
| ENS00000151310 | 3204.220809 | 1974.744735 | -2.222755177 | 0.967384149 | -0.698307934 | 128440 | 40.94 | 4  | 440257286 | 44038726  | protein_coding | short coiled-coil protein                                      | 40.94 | SCCP     |
| ENS00000153443 | 49.17421861 | 128.993238  | -1.422610459 | 0.97015165  | -1.391321406 | 6144   | 64.7  | 4  | 4608883   | 4615027   | protein_coding | UBA like domain containing 1                                   | 64.7  | UBALD1   |
| ENS00000153531 | 9288.209188 | 12453.40568 | -1.777303056 | 0.979963743 | -0.423067566 | 53914  | 55.43 | 13 | 113399910 | 113453524 | protein_coding | ADP-ribosylhydrolase like 1                                    | 55.43 | ARHPL1   |
| ENS00000154133 | 358.274183  | 575.8748434 | -1.341155704 | 0.961187618 | -0.684691213 | 14809  | 52.98 | 11 | 124883691 | 124898500 | protein_coding | roundabout guidance receptor 4                                 | 52.98 | ROBO4    |
| ENS00000154358 | 5359.774249 | 9852.824688 | -2.872330282 | 0.999999814 | -0.878365151 | 170744 | 53.87 | 1  | 228208130 | 228378874 | protein_coding | obscurin, cytoskeletal calmodulin and titin-interacting RhoGEF | 53.87 | OBSCN    |
| ENS00000156453 | 358.469786  | 600.4956671 | -1.385435291 | 0.965703327 | -0.744302311 | 26135  | 54.92 | 5  | 141853111 | 141879246 | protein_coding | protocadherin 11                                               | 54.92 | PCDH11   |
| ENS00000156860 | 206.0814088 | 363.4633702 | -1.297148776 | 0.955337939 | -0.818595615 | 12383  | 59.46 | 16 | 30658431  | 30670814  | protein_coding | fibrosin                                                       | 59.46 | FBS      |
| ENS00000156885 | 1216.126925 | 2260.902805 | -1.933505597 | 0.988308513 | -0.894605164 | 697    | 71.49 | 16 | 31427731  | 31428428  | protein_coding | cytochrome c oxidase subunit 6A2                               | 71.49 | COX6A2   |
| ENS00000157510 | 1355.817522 | 1775.575784 | -1.256820184 | 0.951364547 | -0.389271861 | 69931  | 46.32 | 5  | 149271817 | 149341802 | protein_coding | actin filament associated protein 1 like 1                     | 46.32 | AFAP1L1  |
| ENS00000157633 | 353.0246624 | 738.5149089 | -0.262179457 | 0.988799389 | -1.064858072 | 50547  | 56.73 | 7  | 81245000  | 81295547  | protein_coding | solute carrier family 38 member 10                             | 56.73 | SLC38A10 |
| ENS00000158863 | 641.0279661 | 951.1080035 | -1.49090025  | 0.976075658 | -0.569221878 | 15739  | 57.17 | 7  | 20209159  | 22104988  | protein_coding | family with sequence similarity 160 member B2                  | 57.17 | FM160B2  |
| ENS00000159069 | 800.8852269 | 1828.534912 | -1.156376706 | 0.9962667   | -1.173118538 | 4261   | 68.36 | 9  | 136940435 | 136944696 | protein_coding | F-box and WD repeat domain containing 5                        | 68.36 | FBX5     |
| ENS00000159640 | 110.4298753 | 263.0390584 | -1.555327319 | 0.9770621   | -1.252146513 | 21319  | 59.95 | 9  | 34747061  | 36493880  | protein_coding | angiotensin I converting enzyme                                | 59.95 | ACE      |
| ENS00000159840 | 431.6317896 | 807.5189534 | -1.712539138 | 0.978883301 | -0.903694999 | 10031  | 58.32 | 7  | 143381080 | 143391111 | protein_coding | zxyxin                                                         | 58.32 | ZYX      |
| ENS00000159842 | 2896.094747 | 3801.990328 | -1.725000701 | 0.978839248 | -0.3924606   | 225503 | 55.2  | 7  | 17003518  | 1229201   | protein_coding | actin-binding BCR-related                                      | 55.2  | ABR2     |
| ENS00000160014 | 2934.304763 | 3591.426811 | -1.226347859 | 0.950274866 | -0.291538395 | 9719   | 57.51 | 9  | 46601074  | 46610793  | protein_coding | calmodulin 3                                                   | 57.51 | CALM3    |
| ENS00000160271 | 757.4253769 | 1072.800835 | -1.255577649 | 0.951291063 | -0.502206602 | 51614  | 58.92 | 9  | 133097720 | 133149334 | protein_coding | ral guanine nucleotide dissociation stimulator                 | 58.92 | RALGDS   |
| ENS00000160285 | 819.801889  | 1132.597582 | -1.311091387 | 0.956961793 | -0.466288135 | 40683  | 53.33 | 21 | 46188141  | 46228824  | protein_coding | lanosterol synthase                                            | 53.33 | LSS      |
| ENS00000160360 | 260.7620687 | 479.0466733 | -1.314509081 | 0.957389305 | -0.877486406 | 32129  | 60.05 | 9  | 136327476 | 136359605 | protein_coding | G protein signaling modulator 1                                | 60.05 | GSPM1    |
| ENS00000160392 | 668.9992458 | 1032.960384 | -1.574158393 | 0.978237699 | -0.626708435 | 28991  | 50.5  | 19 | 40319536  | 40348527  | protein_coding | chromosome 19 open reading frame 47                            | 50.5  | ORF47    |
| ENS00000160445 | 1319.002174 | 1906.675893 | -1.715282136 | 0.978865639 | -0.531612686 | 42628  | 51.42 | 9  | 128729786 | 128772414 | protein_coding | zyg-11 related cell cycle regulator                            | 51.42 | ZER1     |
| ENS00000160446 | 20.97348038 | 59.76644098 | -1.488749234 | 0.976065171 | -1.510769545 | 3258   | 61.4  | 9  | 128720869 | 128724127 | protein_coding | zinc finger DHC-type cyclin containing 12                      | 61.4  | ZDHHC12  |
| ENS00000160539 | 1333.949812 | 2027.716705 | -1.594912003 | 0.979594854 | -0.604151517 | 19568  | 54.56 | 9  | 131289694 | 131309262 | protein_coding | phospholipid phosphatase 7 (inactive)                          | 54.56 | PLPP7    |
| ENS00000160685 | 361.2581565 | 587.1443411 | -1.492165496 | 0.976088036 | -0.700685052 | 15892  | 60.41 | 1  | 1         |           |                |                                                                |       |          |

|                 |              |               |              |             |              |       |       |    |           |           |                |                                                            |       |         |
|-----------------|--------------|---------------|--------------|-------------|--------------|-------|-------|----|-----------|-----------|----------------|------------------------------------------------------------|-------|---------|
| ENSG00000167543 | 145.3403712  | 327.9437847   | -1.654827514 | 0.981375085 | -1.174013037 | 7105  | 63.48 | 17 | 29566052  | 29573157  | protein_coding | tumor protein p53 inducible protein 13                     | 63.48 | TP5313  |
| ENSG00000167549 | 1145.629935  | 1574.54121    | -1.501609617 | 0.976103545 | -0.458790421 | 8151  | 60.29 | 17 | 29614756  | 29622907  | protein_coding | coronin 6                                                  | 60.29 | CORO6   |
| ENSG00000167566 | 243.4305111  | 504.0751165   | -1.725388728 | 0.978838632 | -1.044393221 | 37604 | 52.89 | 12 | 49791146  | 49828750  | protein_coding | NCK associated protein 5 like                              | 52.89 | NCKAP5L |
| ENSG00000167658 | 20633.6661   | 30816.3065    | -2.752080906 | 0.98980996  | -0.578693782 | 9413  | 59.53 | 19 | 3976056   | 3985469   | protein_coding | eukaryotic translation elongation factor 2                 | 59.53 | EEF2    |
| ENSG00000167671 | 901.6958779  | 1372.572456   | -1.641267274 | 0.981540933 | -0.606169478 | 12823 | 59.86 | 19 | 4448999   | 4457822   | protein_coding | UBX domain protein 6                                       | 59.86 | UBXN6   |
| ENSG00000167674 | 217.8704374  | 355.8882279   | -1.296802168 | 0.955298928 | -0.70795376  | 29924 | 57.07 | 19 | 4472287   | 4502211   | protein_coding | HDFG like 2                                                | 57.07 | HDFGL2  |
| ENSG00000167676 | 2871.091347  | 4231.871329   | -1.705357301 | 0.978793212 | -0.559698164 | 16285 | 59.39 | 19 | 4502180   | 4518465   | protein_coding | perilipin 4                                                | 59.39 | PLIN4   |
| ENSG00000167680 | 52.92153793  | 176.2130945   | -2.042618206 | 0.98906908  | -1.735394243 | 17215 | 57.84 | 19 | 4542593   | 4559808   | protein_coding | semaphorin 6B                                              | 57.84 | SEMA6B  |
| ENSG00000167700 | 82.08181865  | 172.6456775   | -1.406300427 | 0.967769719 | -1.073798464 | 2139  | 66.96 | 8  | 144509074 | 144511213 | protein_coding | major facilitator superfamily domain containing 3          | 66.96 | MFSD3   |
| ENSG00000167701 | 195.1133828  | 397.4715662   | -1.558540078 | 0.977240127 | -1.026538923 | 4201  | 68.44 | 8  | 144502973 | 144507174 | protein_coding | glutamic-pyruvic transaminase                              | 68.44 | GPT     |
| ENSG00000167702 | 18.3617938   | 43.2664137    | -1.271219374 | 0.952524431 | -1.236540529 | 8159  | 63.6  | 8  | 144466043 | 144474202 | protein_coding | kinesin family member C2                                   | 63.6  | KIFC2   |
| ENSG00000167705 | 575.5958607  | 853.2999874   | -1.314390357 | 0.957374214 | -0.567996809 | 3932  | 64.3  | 17 | 14646145  | 1650077   | protein_coding | Rab interacting lysosomal protein                          | 64.3  | RILP    |
| ENSG00000167792 | 6357.084187  | 9550.262342   | -2.7704563   | 0.995503104 | -0.58717517  | 5683  | 55.96 | 11 | 67606852  | 67612535  | protein_coding | NADH:ubiquinone oxidoreductase core subunit V1             | 55.96 | NDUFV1  |
| ENSG00000167874 | 163.3163248  | 339.4462921   | -1.430165961 | 0.971349017 | -1.055514319 | 1034  | 63.09 | 17 | 7855065   | 7856099   | protein_coding | transmembrane protein 88                                   | 63.09 | TMEM88  |
| ENSG00000167900 | 8.364988374  | 27.00827941   | -1.357819604 | 0.96337647  | -1.690962904 | 13158 | 53.2  | 17 | 78174075  | 78187233  | protein_coding | thymidine kinase 1                                         | 53.2  | TK1     |
| ENSG00000167930 | 633.9357253  | 960.3293545   | -1.444707163 | 0.973448738 | -0.599192704 | 34425 | 52.16 | 16 | 234546    | 268971    | protein_coding | family with sequence similarity 234 member A               | 52.16 | FAM234A |
| ENSG00000167965 | 223.5715789  | 381.8366013   | -1.267276887 | 0.952155981 | -0.7722186   | 5168  | 61.98 | 16 | 2204248   | 2209416   | protein_coding | MTOR associated protein, LST8 homolog                      | 61.98 | MLST8   |
| ENSG00000167967 | 64.51246225  | 164.1632766   | -1.727024645 | 0.978835951 | -1.347481645 | 12176 | 58.12 | 16 | 2223566   | 2235742   | protein_coding | E4F transcription factor 1                                 | 61.58 | E4F1    |
| ENSG00000167969 | 872.2994422  | 1609.747109   | -2.015164305 | 0.987119199 | -0.883938687 | 12905 | 55.58 | 16 | 2239395   | 2252300   | protein_coding | enoyl-CoA delta isomerase 1                                | 55.22 | EC11    |
| ENSG00000167996 | 174.2079837  | 319.4698969   | -1.223662082 | 0.950141254 | -0.874869523 | 7942  | 50.42 | 11 | 61959718  | 61967660  | protein_coding | ferritin heavy chain 1                                     | 50.42 | FTH1    |
| ENSG00000168056 | 674.1136716  | 1134.316356   | -1.765807497 | 0.985901325 | -0.750759497 | 20125 | 60.12 | 11 | 65583805  | 65558930  | protein_coding | latent transforming growth factor beta binding protein 3   | 60.22 | LTRP3   |
| ENSG00000168159 | 1223.594045  | 1763.56851    | -1.519960062 | 0.976105178 | -0.527372632 | 8705  | 56.59 | 1  | 228487061 | 228495766 | protein_coding | ring finger protein 187                                    | 56.59 | RNF187  |
| ENSG00000168397 | 416.1558801  | 612.4833886   | -1.2262381   | 0.950287553 | -0.557546695 | 36644 | 52.33 | 2  | 241637213 | 241673857 | protein_coding | autophagy related 4B cysteine peptidase                    | 52.33 | ATG4B   |
| ENSG00000168477 | 898.6855452  | 1444.244139   | -1.503930744 | 0.976101201 | -0.684426338 | 74180 | 54.31 | 6  | 32041154  | 32115334  | protein_coding | tenascin XB                                                | 54.31 | TNXB    |
| ENSG00000168542 | 3278.787926  | 5789.433278   | -1.228461259 | 0.950363004 | -0.820259541 | 38426 | 33.8  | 2  | 188947320 | 189012746 | protein_coding | collagen type III alpha 1 chain                            | 33.8  | COL3A1  |
| ENSG00000168936 | 729.1262922  | 1102.028649   | -1.536418311 | 0.976322687 | -0.619364559 | 5406  | 62.46 | 4  | 4715952   | 4721258   | protein_coding | transmembrane protein 129                                  | 62.46 | TMEM129 |
| ENSG00000169504 | 14250.30768  | 10127.80358   | 1.968687105  | 0.956852401 | 0.492671728  | 98967 | 41.67 | 1  | 24745357  | 24844324  | protein_coding | chloride intracellular channel 4                           | 41.67 | CLIC4   |
| ENSG00000169564 | 288.327038   | 548.1310471   | -1.527134292 | 0.976159838 | -0.926814721 | 1749  | 55.2  | 2  | 370673454 | 37089203  | protein_coding | poly(rC) binding protein 1                                 | 55.2  | PCBP1   |
| ENSG00000169692 | 245.9304033  | 582.100744987 | -2.100744987 | 0.9880122   | -1.255116802 | 14280 | 62.68 | 9  | 136687423 | 136687423 | protein_coding | 1-acylglycerol-3-phosphate O-acyltransferase 2             | 62.68 | AGPAT2  |
| ENSG00000169696 | 111.23963    | 225.7644412   | -1.3611657   | 0.963733416 | -1.021147422 | 40599 | 60.76 | 17 | 81976807  | 82017406  | protein_coding | ASPSCR1, UBI domain containing tether for SLC24A4          | 60.76 | ASPSCR1 |
| ENSG00000169718 | 317.8032794  | 549.5989483   | -1.612510309 | 0.98057035  | -0.790245232 | 8381  | 64.45 | 17 | 82057506  | 82065887  | protein_coding | dihydrouridine synthase 1 like                             | 64.45 | DUS1L   |
| ENSG00000169727 | 663.9737357  | 1084.59459    | -1.641736631 | 0.981543228 | -0.7079578   | 6779  | 66.61 | 17 | 82050691  | 82057470  | protein_coding | G protein pathway suppressor 1                             | 66.61 | GPS1    |
| ENSG00000169957 | 387.2029198  | 610.0421159   | -1.384166396 | 0.96560727  | -0.655819736 | 2820  | 64.52 | 16 | 30524001  | 30526821  | protein_coding | zinc finger protein 768                                    | 64.52 | ZNF768  |
| ENSG00000170421 | 1469.792637  | 2014.480603   | -1.417690381 | 0.969383521 | -0.454795285 | 52767 | 50.21 | 12 | 52897187  | 52949954  | protein_coding | keratin 8                                                  | 50.58 | KRT8    |
| ENSG00000170604 | 98.77783415  | 195.0997333   | -1.315491117 | 0.957515149 | -0.981952565 | 2563  | 68.49 | 19 | 45883607  | 45886700  | protein_coding | interferon regulatory factor 2 binding protein 1           | 68.49 | IRF2BP1 |
| ENSG00000170638 | 61.65226736  | 148.1023311   | -1.367254061 | 0.964309145 | -1.264368509 | 13683 | 62.8  | 22 | 50185915  | 50195958  | protein_coding | TraB domain containing                                     | 62.8  | TraB    |
| ENSG00000170906 | 1287.562307  | 1842.938458   | -1.397507023 | 0.966760714 | -0.517366431 | 6529  | 54.99 | 12 | 54102728  | 54109257  | protein_coding | NADH:ubiquinone oxidoreductase subunit A3                  | 54.99 | NDUFA3  |
| ENSG00000171033 | 9216.224912  | 7333.564173   | 1.939659683  | 0.955543153 | 0.329661394  | 89128 | 34.75 | 8  | 78516139  | 78605267  | protein_coding | cAMP-dependent protein kinase inhibitor alpha              | 34.75 | PKIA    |
| ENSG00000171159 | 111.7241054  | 261.3457724   | -1.728303272 | 0.978833674 | -1.226019239 | 3668  | 58.88 | 9  | 128160260 | 128169228 | protein_coding | chromosome 9 open reading frame 16                         | 58.88 | C9orf16 |
| ENSG00000171206 | 696.0017269  | 1005.403471   | -1.360650034 | 0.963680882 | -0.530037679 | 13911 | 51.31 | 10 | 102644496 | 102658407 | protein_coding | tripartite motif containing 8                              | 51.31 | TRIM8   |
| ENSG00000171222 | 47.28410398  | 165.548822    | -1.813936498 | 0.984414167 | -1.772597187 | 5855  | 47.71 | 20 | 39593167  | 39599472  | protein_coding | SCAN domain containing 1                                   | 47.71 | SCAND1  |
| ENSG00000171298 | 566.9035038  | 1132.912184   | -2.30371218  | 0.991327914 | -0.998806877 | 18323 | 58.33 | 10 | 80101556  | 80119879  | protein_coding | glucosidase alpha, acid                                    | 58.33 | GA      |
| ENSG00000171443 | 35.51721559  | 93.28920563   | -1.352858847 | 0.962790354 | -1.393191674 | 3116  | 62.18 | 19 | 55600022  | 55603138  | protein_coding | zinc finger protein 524                                    | 62.18 | ZNF524  |
| ENSG00000171680 | 194.5975435  | 430.2208841   | -1.887984489 | 0.987465201 | -1.14458406  | 53969 | 58.85 | 17 | 6466092   | 6520061   | protein_coding | pleckstrin homology and rhoGEF domain containing G5        | 58.85 | PLEKHG5 |
| ENSG00000171992 | 15293.82974  | 18739.29809   | -1.535695232 | 0.976305549 | -0.293117198 | 58140 | 52.53 | 5  | 150601080 | 150659220 | protein_coding | synaptotagmin                                              | 52.53 | SYNP0   |
| ENSG00000172037 | 6577.948193  | 10027.91661   | -3.605970338 | 1           | -0.608312354 | 12004 | 57.34 | 3  | 49121114  | 49133118  | protein_coding | laminin subunit beta 2                                     | 57.34 | LAMB2   |
| ENSG00000172046 | 1201.400495  | 1599.263823   | -1.328119097 | 0.959255671 | -0.41269709  | 12892 | 56.09 | 4  | 49108046  | 49120938  | protein_coding | ubiquitin specific peptidase 19                            | 56.09 | USP19   |
| ENSG00000172115 | 23505.17061  | 16986.92239   | 2.823406688  | 0.99967242  | 0.468553572  | 5270  | 43.01 | 7  | 25120091  | 25125361  | protein_coding | cytochrome c, somatic                                      | 43.01 | CYC     |
| ENSG00000172270 | 12644.45244  | 23282.82635   | -3.726731793 | 1           | -0.880770074 | 12216 | 62.58 | 19 | 571277    | 583493    | protein_coding | basigin (Ok blood group)                                   | 62.58 | BSG     |
| ENSG00000172346 | 2076.753537  | 3552.503045   | -2.620016778 | 0.992580251 | -0.774505875 | 16978 | 55.8  | 22 | 41560763  | 41577741  | protein_coding | cold shock domain containing C2                            | 55.8  | CSDC2   |
| ENSG00000172354 | 739.6727413  | 1304.207037   | -1.925347969 | 0.988701525 | -0.818213894 | 5643  | 65.91 | 7  | 100673531 | 100697174 | protein_coding | G protein subunit beta 2                                   | 65.91 | GNB2    |
| ENSG00000172366 | 290.6238219  | 564.1631429   | -1.559177037 | 0.977276911 | -0.956959246 | NA    | NA    | NA | NA        | NA        | NA             | NA                                                         | NA    | NA      |
| ENSG00000172534 | 466.6181233  | 735.5107811   | -1.435270164 | 0.972134575 | -0.656504146 | 24254 | 59.51 | 11 | 153947553 | 153971807 | protein_coding | host cell factor C1                                        | 59.51 | HCF1    |
| ENSG00000172638 | 861.2594803  | 1327.28596    | -1.658905433 | 0.981226987 | -0.623959366 | 7151  | 60.57 | 11 | 65866445  | 65873592  | protein_coding | EGF containing fibulin like extracellular matrix protein 2 | 60.57 | EFEMP2  |
| ENSG00000172663 | 281.7442656  | 481.8923041   | -1.277341534 | 0.953149352 | -0.774324514 | 7562  | 56.67 | 11 | 67461710  | 67469272  | protein_coding | transmembrane protein 134                                  | 56.67 | TMEM134 |
| ENSG00000172725 | 112.4073522  | 220.7235511   | -1.311103526 | 0.959663286 | -0.973504068 | 8311  | 64.53 | 11 | 67435510  | 67443821  | protein_coding | coronin 1B                                                 | 64.53 | CORO1B  |
| ENSG00000172889 | 284.9691523  | 826.3768298   | -2.392673362 | 0.987721166 | -1.53599447  | 13822 | 67.31 | 9  | 136658856 | 136672678 | protein_coding | EGF like domain multiple 7                                 | 67.31 | EGFL7   |
| ENSG00000173020 | 723.46949086 | 1064.108854   | -1.39238783  | 0.966273509 | -0.556650794 | 20146 | 61.02 | 11 | 67266410  | 67286556  | protein_coding | G protein-coupled receptor kinase 2                        | 61.02 | GPRK2   |
| ENSG00000173153 | 891.7963479  | 1550.410253   | -2.025503697 | 0.98803819  | -0.79786382  | 11171 | 57.05 | 11 | 64305572  | 64316743  | protein_coding | estrogen related receptor alpha                            | 57.05 |         |

|                 |             |             |              |             |              |        |       |    |           |           |                                    |                                                                      |       |            |
|-----------------|-------------|-------------|--------------|-------------|--------------|--------|-------|----|-----------|-----------|------------------------------------|----------------------------------------------------------------------|-------|------------|
| ENSG00000178719 | 815.3301185 | 1164.214521 | -1.414747954 | 0.968939705 | -0.513900702 | 3357   | 66.68 | 8  | 143990058 | 143993415 | protein_coding                     | glutamate ionotropic receptor NMDA type subunit associated protein 1 | 66.68 | GRINA      |
| ENSG00000178814 | 276.2586923 | 684.6496262 | -2.152610207 | 0.988879719 | -1.30934601  | 12699  | 65.95 | 8  | 144051266 | 144063965 | protein_coding                     | 5-oxoprolinase, ATP-hydrolysing                                      | 65.95 | OLAHP      |
| ENSG00000178950 | 173.0397827 | 318.4174011 | -1.459567047 | 0.974917813 | -0.879815421 | 83097  | 56.5  | 4  | 849276    | 932373    | protein_coding                     | cyclin G associated kinase                                           | 56.5  | GAK        |
| ENSG00000179091 | 7860.381177 | 9504.191734 | -1.269920848 | 0.952399597 | -0.273964665 | 2498   | 63.31 | 8  | 144095027 | 144097525 | protein_coding                     | cytochrome c1                                                        | 63.31 | CYC1       |
| ENSG00000179094 | 640.4526425 | 1301.524447 | -1.938915869 | 0.987950373 | -1.023038609 | 16034  | 58.98 | 17 | 8140472   | 8156506   | protein_coding                     | period circadian clock 1                                             | 58.98 | PER1       |
| ENSG00000179115 | 389.793815  | 585.2526335 | -1.247698266 | 0.950924863 | -0.586348298 | 11558  | 53.91 | 19 | 12922479  | 12934037  | protein_coding                     | phenylalanyl-tRNA synthetase alpha subunit                           | 53.91 | FAR5A      |
| ENSG00000179262 | 1290.696539 | 1814.192368 | -1.727017705 | 0.978835963 | -0.491178298 | 7787   | 54.44 | 8  | 12945855  | 12953642  | protein_coding                     | RAD23 homolog A, nucleotide excision repair protein                  | 54.44 | RAD23A     |
| ENSG00000179271 | 452.0139559 | 726.5655677 | -1.262137108 | 0.951728801 | -0.684725681 | 4117   | 55.03 | 19 | 12953119  | 12957236  | protein_coding                     | GADD45G interacting protein 1                                        | 55.03 | GADD45GIP1 |
| ENSG00000179344 | 64.43250263 | 282.2152397 | -1.926733118 | 0.988649811 | -2.130935359 | 8916   | 45.39 | 6  | 32659467  | 32668383  | protein_coding                     | major histocompatibility complex, class II, DQ beta 1                | 45.39 | HLA-DQB1   |
| ENSG00000179364 | 460.6384465 | 853.7680041 | -1.950301238 | 0.98707182  | -0.890209269 | 97584  | 57.4  | 14 | 105300563 | 105398147 | protein_coding                     | phosphofurin acidic cluster sorting protein 2                        | 57.4  | PACS2      |
| ENSG00000179526 | 302.0040626 | 542.3693707 | -1.356821429 | 0.963263391 | -0.84470775  | 9491   | 60.75 | 8  | 144098633 | 144108124 | protein_coding                     | SHANK associated RH domain interactor                                | 60.75 | SHARPIN    |
| ENSG00000179611 | 271.4199624 | 442.236678  | -1.226076982 | 0.950262426 | -0.704291852 | 2775   | 62.84 | 13 | 43968424  | 43971199  | processed_pseudogene               |                                                                      | 62.84 | DGKZP1     |
| ENSG00000179632 | 2149.285207 | 2647.366474 | -1.304715218 | 0.956200837 | -0.300700981 | 3112   | 63.19 | 8  | 144104490 | 144107611 | protein_coding                     | MAF1 homolog, negative regulator of RNA polymerase III               | 63.19 | MAF1       |
| ENSG00000179776 | 1899.414251 | 2611.034608 | -1.532817264 | 0.97624528  | -0.459066997 | 38164  | 49.55 | 16 | 66366622  | 66404786  | protein_coding                     | cadherin 5                                                           | 49.55 | CDH5       |
| ENSG00000179832 | 166.4988837 | 338.7311296 | -1.494844855 | 0.976098285 | -1.024628072 | 113924 | 53.17 | 8  | 144148016 | 144261940 | protein_coding                     | maestro heat like repeat family member 1                             | 53.17 | MROH1      |
| ENSG00000179950 | 1161.790047 | 1566.839268 | -1.483952344 | 0.976009145 | -0.431507814 | 13515  | 62.04 | 8  | 143816344 | 143829859 | protein_coding                     | poly(U) binding splicing factor 60                                   | 62.04 | PUF60      |
| ENSG00000180155 | 2426.942548 | 3998.090613 | -2.010472706 | 0.986790953 | -0.485584369 | 6613   | 64.18 | 8  | 142771197 | 142777810 | protein_coding                     | Ly6/urotensin 1                                                      | 64.18 | LYNKL1     |
| ENSG00000180509 | 27.34813294 | 93.65000751 | -1.481693841 | 0.975970313 | -1.775836767 | NA     | NA    | NA | NA        | NA        | NA                                 | NA                                                                   | NA    | NA         |
| ENSG00000180891 | 670.9990859 | 995.1167692 | -1.515142331 | 0.976093023 | -0.568555023 | 94080  | 51.38 | 8  | 15786243  | 157955323 | protein_coding                     | CUE domain containing 1                                              | 51.38 | CUEDC1     |
| ENSG00000180900 | 139.9911784 | 352.1148332 | -1.940039722 | 0.987869078 | -1.330710086 | 24459  | 62.5  | 8  | 43790920  | 43815379  | protein_coding                     | scribbled planar cell polarity protein                               | 62.5  | SCRIB      |
| ENSG00000181061 | 3739.255269 | 2710.068659 | -1.99086271  | 0.953629961 | -0.464421561 | 20233  | 42.66 | 8  | 14284298  | 42804531  | protein_coding                     | HIG1 hypoxia inducible domain family member 1A                       | 42.66 | HIGD1A     |
| ENSG00000181409 | 22.88280247 | 78.24941146 | -1.683848439 | 0.979800209 | -1.77381615  | 48782  | 61.42 | 17 | 81117295  | 81166077  | protein_coding                     | apoptosis associated tyrosine kinase                                 | 61.42 | AATK       |
| ENSG00000182054 | 13202.64271 | 18178.41829 | -2.822591245 | 0.999910317 | -0.461399939 | 19459  | 52.54 | 15 | 90083045  | 90102504  | protein_coding                     | isocitrate dehydrogenase (NADP(+)) 2, mitochondrial                  | 52.54 | IDH2       |
| ENSG00000182087 | 500.6581947 | 863.5941619 | -1.635953317 | 0.98147023  | -0.786527496 | 11531  | 65.7  | 19 | 1009648   | 10211719  | protein_coding                     | transmembrane protein 259                                            | 65.7  | TMEM259    |
| ENSG00000182095 | 207.9560435 | 416.430907  | -1.648991461 | 0.981509682 | -1.001798536 | 118624 | 54.68 | 7  | 5306790   | 5425414   | protein_coding                     | trinuclotide repeat containing 18                                    | 54.68 | TNRC18     |
| ENSG00000182154 | 703.8840295 | 1401.232917 | -2.268054688 | 0.984175912 | -0.993286998 | 1356   | 72.44 | 9  | 137551199 | 137552555 | processed_pseudogene               |                                                                      | 72.44 | MRPL41     |
| ENSG00000182175 | 167.0263881 | 325.5929278 | -1.256095817 | 0.951320738 | -0.963003816 | 53931  | 52.94 | 15 | 93035273  | 93089204  | protein_coding                     | repulsive guidance molecule family member a                          | 52.94 | RGMA       |
| ENSG00000182809 | 2771.386384 | 6933.471278 | -4.285983353 | 1           | -1.322969662 | 7208   | 69.57 | 12 | 105472962 | 105480170 | protein_coding                     | cysteine rich protein 2                                              | 69.57 | CRP2       |
| ENSG00000182871 | 224.0994788 | 720.089028  | -2.356920186 | 0.992578969 | -1.684031211 | 108583 | 59.66 | 21 | 45405137  | 45513720  | protein_coding                     | collagen type XVIII alpha 1 chain                                    | 59.66 | COL18A1    |
| ENSG00000182979 | 300.3870663 | 532.7486632 | -1.718578157 | 0.978852324 | -0.826632372 | 59099  | 59.22 | 14 | 105419820 | 105470729 | protein_coding                     | metastasis associated 1                                              | 59.22 | MTA1       |
| ENSG00000183072 | 638.2517473 | 1087.119252 | -1.725396271 | 0.97883862  | -0.768312718 | 3248   | 61.5  | 5  | 113232109 | 113235357 | protein_coding                     | NK2 homeobox 5                                                       | 61.5  | NOX5       |
| ENSG00000183087 | 1255.232057 | 1755.306137 | -1.355252575 | 0.963077756 | -0.483766586 | 43518  | 57.09 | 13 | 173802049 | 173864067 | protein_coding                     | growth arrest specific 12                                            | 57.09 | GAS6       |
| ENSG00000183207 | 496.2257296 | 782.2893759 | -1.519104344 | 0.976101705 | -0.656705831 | 22547  | 53.06 | 19 | 48993448  | 49015995  | protein_coding                     | RuvB like AAA ATPase 2                                               | 53.06 | RUVBL2     |
| ENSG00000183458 | 6.207412245 | 28.14325882 | -1.666578386 | 0.980847002 | -2.180725527 | 24157  | 62.84 | 16 | 14911551  | 14935708  | transcribed_unprocessed_pseudogene |                                                                      | 62.84 |            |
| ENSG00000183751 | 138.8819086 | 270.4493896 | -1.389940076 | 0.966062342 | -0.961499962 | 10896  | 64.29 | 16 | 1972037   | 1982933   | protein_coding                     | transducin beta like 3                                               | 64.29 | TBL3       |
| ENSG00000183963 | 1516.983118 | 2560.478739 | -2.151764364 | 0.9889393   | -0.75520855  | 40652  | 54.79 | 22 | 31064105  | 31104757  | protein_coding                     | smoothelin                                                           | 54.79 | SMLN       |
| ENSG00000184113 | 199.7435498 | 520.2354454 | -1.656501822 | 0.981319137 | -1.381015782 | 4521   | 63.73 | 22 | 19523024  | 19527545  | protein_coding                     | claudin 5                                                            | 63.73 | CLDN5      |
| ENSG00000184281 | 129.0476417 | 281.7864064 | -1.513631162 | 0.976092034 | -1.126698239 | 3390   | 62.64 | 11 | 2400488   | 2403878   | protein_coding                     | tumor suppressing subtransferable candidate 4                        | 62.64 | TSSC4      |
| ENSG00000184343 | 416.9722673 | 709.7651629 | -1.530359436 | 0.976203101 | -0.767390331 | 9320   | 64.63 | X  | 153776412 | 153785732 | protein_coding                     | SRSF protein kinase 3                                                | 64.63 | SRPK3      |
| ENSG00000184489 | 3124.213401 | 7110.672468 | -3.352584084 | 1           | -1.186493004 | 40461  | 62.4  | 8  | 141391993 | 141432454 | protein_coding                     | protein tyrosine phosphatase type IVA, member 3                      | 62.4  | PTP4A3     |
| ENSG00000184601 | 461.7621486 | 998.5146633 | -2.065719528 | 0.988616381 | -1.112633656 | 10831  | 62.78 | 14 | 104759684 | 104905519 | protein_coding                     | chromosome 14 open reading frame 18A                                 | 62.78 | C1orf180   |
| ENSG00000184640 | 1067.707654 | 1526.150525 | -1.493493886 | 0.976093846 | -0.515380822 | 220027 | 54.75 | 17 | 72070569  | 72500996  | protein_coding                     | septin 9                                                             | 54.75 | SEPT9      |
| ENSG00000184682 | 20.34585126 | 54.8263814  | -1.349939735 | 0.962416375 | -1.37696785  | NA     | NA    | NA | NA        | NA        | NA                                 | NA                                                                   | NA    | NA         |
| ENSG00000184702 | 1517.405229 | 2055.591944 | -1.304626709 | 0.956190563 | -0.437947489 | 10308  | 66.81 | 22 | 19714464  | 19724772  | protein_coding                     | septin 5                                                             | 66.81 | SEPT5      |
| ENSG00000184916 | 123.6010668 | 286.0558235 | -1.559749618 | 0.97731044  | -1.210605565 | 27843  | 65.88 | 14 | 105140981 | 105168824 | protein_coding                     | jagged 2                                                             | 65.88 | JAG2       |
| ENSG00000184967 | 39.03190146 | 103.0661217 | -1.525236713 | 0.976140083 | -1.409147868 | 8025   | 63.79 | 12 | 132144488 | 132152473 | protein_coding                     | nuclear complex associated 4 homolog                                 | 63.79 | NOCAL4     |
| ENSG00000184990 | 195.5490205 | 422.4347353 | -1.453709378 | 0.974460313 | -1.111198219 | 15394  | 52.32 | 14 | 104753100 | 104768494 | protein_coding                     | SIVA1 apoptosis inducing factor                                      | 52.32 | SIVA1      |
| ENSG00000185000 | 304.8600513 | 538.7330259 | -1.637884987 | 0.981503889 | -0.821423397 | 12326  | 63.02 | 8  | 144314584 | 144326910 | protein_coding                     | diacylglycerol O-acyltransferase 1                                   | 63.02 | DGAT1      |
| ENSG00000185024 | 141.6236055 | 262.9073293 | -1.23218366  | 0.950488485 | -0.892465107 | 106303 | 56.66 | 14 | 105209286 | 105315589 | protein_coding                     | BRF1, RNA polymerase III transcription initiation factor subunit     | 56.66 | BRF1       |
| ENSG00000185049 | 62.59271581 | 125.6082344 | -1.238413601 | 0.950653936 | -1.004864366 | 59189  | 48.3  | 4  | 1982714   | 2041903   | protein_coding                     | negative elongation factor complex member A                          | 48.3  | NELFA      |
| ENSG00000185122 | 1100.992496 | 2109.276662 | -2.564694176 | 0.998627618 | -0.937943702 | 23131  | 56.87 | 8  | 144291914 | 144314722 | protein_coding                     | heat shock transcription factor 1                                    | 56.87 | HSF1       |
| ENSG00000185187 | 104.3157831 | 202.6875933 | -1.350636923 | 0.962507463 | -0.958301556 | 11739  | 65.22 | 11 | 405716    | 417455    | protein_coding                     | single Ig and TIR domain containing                                  | 65.22 | SIGIRR     |
| ENSG00000185236 | 511.4889068 | 1116.97047  | -2.439745981 | 0.98347014  | -1.126816189 | 14453  | 59.05 | 19 | 8389981   | 8404434   | protein_coding                     | RAB11B, member RAS oncogene family                                   | 59.05 | RAB11B     |
| ENSG00000185340 | 74.55960564 | 193.1016145 | -1.533367148 | 0.976255891 | -1.37289413  | 6203   | 64.97 | 22 | 2930652   | 29312785  | protein_coding                     | growth arrest specific 2 like 1                                      | 64.97 | GAS2L1     |
| ENSG00000185359 | 242.4331209 | 422.5270848 | -1.469051879 | 0.975562256 | -0.801457012 | 19812  | 60.6  | 17 | 81683326  | 81703138  | protein_coding                     | hepatocyte growth factor-regulated tyrosine kinase substrate         | 60.6  | HGS        |
| ENSG00000185504 | 108.5072298 | 258.6725099 | -1.755667704 | 0.978847147 | -1.25333557  | 14076  | 61.6  | 17 | 81539885  | 81553961  | protein_coding                     | Fanconi anemia core complex associated protein 100                   | 61.6  | FAAP100    |
| ENSG00000185507 | 22.66412926 | 63.48013876 | -1.327649999 | 0.959187468 | -1.485894547 | 3446   | 67.07 | 11 | 612553    | 615999    | protein_coding                     | interferon regulatory factor 7                                       | 67.07 | IRF7       |
| ENSG00000185633 | 368.7917895 | 724.4514531 | -1.793687776 | 0.98190642  | -0.974082478 | 5812   | 62.05 | 12 | 57234903  | 57240715  | protein_coding                     | NDUFA4, mitochondrial complex associated like 2                      | 62.05 | NDUFA4L2   |
| ENSG00000185787 | 5032.696658 | 3945.53379  | -2.899371678 | 0.97618485  | -0.351111448 | 87646  | 45.5  | 15 | 788810487 | 78894133  | protein_coding                     | mortality factor 4 like 1                                            | 45.5  |            |

|                 |             |             |              |             |              |        |       |    |           |           |                      |                                                          |       |          |
|-----------------|-------------|-------------|--------------|-------------|--------------|--------|-------|----|-----------|-----------|----------------------|----------------------------------------------------------|-------|----------|
| ENSG00000197912 | 1608.930584 | 2094.476595 | -1.417165571 | 0.969303526 | -0.38048768  | 66851  | 52.29 | 16 | 89490917  | 89557768  | protein_coding       | SPG7, paraplegin matrix AAA peptidase subunit            | 52.29 | SPG7     |
| ENSG00000198276 | 432.3861284 | 751.3034458 | -1.41861829  | 0.969526492 | -0.797075479 | 16586  | 62.54 | 20 | 63939829  | 63956415  | protein_coding       | uridine-cytidine kinase 1 like 1                         | 62.54 | UCKL1    |
| ENSG00000198324 | 266.8755962 | 443.2291709 | -1.270881013 | 0.952491387 | -0.731885447 | 8470   | 57.94 | 12 | 113260651 | 111369121 | protein_coding       | family with sequence similarity 109 member A             | 57.94 | FAM1109A |
| ENSG00000198355 | 385.8405181 | 678.4584457 | -1.426188011 | 0.970719796 | -0.814255804 | 3567   | 69.51 | 22 | 49960513  | 49964080  | protein_coding       | Pim-3 proto-oncogene, serine/threonine kinase            | 69.51 | PIM3     |
| ENSG00000198467 | 10925.6818  | 13830.99745 | -1.728317373 | 0.978833647 | -0.340181892 | 9028   | 56.38 | 9  | 35681992  | 35691020  | protein_coding       | tropomyosin 2                                            | 56.38 | TPM2     |
| ENSG00000198502 | 186.2788612 | 505.2099174 | -1.221656103 | 0.950021626 | -1.439418992 | 12944  | 42.84 | 6  | 32517343  | 32530287  | protein_coding       | major histocompatibility complex, class II, DR beta 5    | 42.84 | HLA-DRB5 |
| ENSG00000198517 | 340.7123437 | 688.7601195 | -1.463083358 | 0.975223895 | -1.015447395 | 12329  | 63.41 | 7  | 1530714   | 1543043   | protein_coding       | MAF bZIP transcription factor K                          | 63.41 | MAFK     |
| ENSG00000198523 | 119102.6638 | 89015.25001 | 2.20606354   | 0.971204865 | 0.420081256  | 12432  | 34.41 | 6  | 118548298 | 118560730 | protein_coding       | phospholamban                                            | 34.41 | PLN      |
| ENSG00000198719 | 84.09442283 | 173.006518  | -1.244124907 | 0.950806898 | -1.040744364 | 24359  | 53.53 | 6  | 170282206 | 170306565 | protein_coding       | delta like canonical Notch ligand 1                      | 53.53 | DLL1     |
| ENSG00000198816 | 192.3975777 | 403.5367188 | -1.652179448 | 0.98144793  | -1.068609319 | 5734   | 60.98 | 19 | 7515292   | 7521026   | protein_coding       | zinc finger protein 358                                  | 60.98 | ZNF358   |
| ENSG00000198837 | 802.8081554 | 1098.740972 | -1.224372203 | 0.950178973 | -0.452724134 | 17195  | 56.48 | 1  | 153929501 | 153946696 | protein_coding       | DENN domain containing 4B                                | 56.48 | DENN4B   |
| ENSG00000198898 | 6688.542378 | 4742.882376 | 2.46500721   | 0.991351806 | 0.495927751  | 110979 | 38.99 | 7  | 116811070 | 116922049 | protein_coding       | capping actin protein of muscle 2-line alpha subunit 2   | 38.99 | CAPZA2   |
| ENSG00000198911 | 2579.624368 | 3220.324507 | -1.29585795  | 0.955192906 | -0.320045071 | 74229  | 48.21 | 22 | 41833079  | 41907308  | protein_coding       | sterol regulatory element binding transcription factor 2 | 48.21 | SREBF2   |
| ENSG00000198925 | 1480.649489 | 2034.20478  | -1.654560005 | 0.981383578 | -0.458234766 | 19945  | 55.14 | 2  | 219209772 | 219229717 | protein_coding       | autophagy related 9A                                     | 55.14 | ATG9A    |
| ENSG00000198931 | 215.7792717 | 388.2985209 | -1.340285554 | 0.961060003 | -0.847609929 | 2605   | 64.35 | 16 | 88809339  | 88811944  | protein_coding       | adenine phosphoribosyltransferase                        | 64.35 | APT      |
| ENSG00000203485 | 274.0178634 | 563.1444301 | -1.845859472 | 0.985723409 | -1.039235033 | 32929  | 63.24 | 14 | 104689606 | 104722535 | protein_coding       | inverted formin, FH2 and WH2 domain containing           | 63.24 | INF2     |
| ENSG00000203883 | 49.28881133 | 129.7443749 | -1.384122812 | 0.965603977 | -1.396339897 | 2059   | 70.68 | 20 | 64047582  | 64049641  | protein_coding       | SRY-box 18                                               | 70.68 | SOX18    |
| ENSG00000204031 | 321.4503055 | 756.3146655 | -1.980718534 | 0.985440986 | -1.234390872 | 29224  | 51.81 | 6  | 32194843  | 32224067  | protein_coding       | notch 4                                                  | 51.81 | NOTCH4   |
| ENSG00000204370 | 5710.546817 | 4116.1508   | 2.758578715  | 0.999999934 | 0.47233306   | 33240  | 41.79 | 11 | 112086773 | 112120013 | protein_coding       | succinate dehydrogenase complex subunit D                | 41.79 | SDHD     |
| ENSG00000204463 | 3406.006811 | 4082.012127 | -1.365800651 | 0.964179867 | -0.261199148 | 13677  | 52.36 | 6  | 31639028  | 31652705  | protein_coding       | BCL2 associated atahanogene 6                            | 52.36 | BAG6     |
| ENSG00000204469 | 2175.83076  | 3039.527441 | -1.875623246 | 0.986560285 | -0.482280698 | 17051  | 53.44 | 6  | 31620720  | 31627771  | protein_coding       | proline rich coiled-coil 2A                              | 53.44 | PRRC2A   |
| ENSG00000204525 | 3775.667699 | 4932.145439 | -1.488786279 | 0.976065473 | -0.385483546 | 3381   | 59.28 | 6  | 31268749  | 31272130  | protein_coding       | major histocompatibility complex, class I, C             | 59.28 | HLA-C    |
| ENSG00000204592 | 5589.267715 | 7310.249677 | -1.724809646 | 0.978839552 | -0.387261402 | 4738   | 55.48 | 6  | 30489467  | 30494205  | protein_coding       | major histocompatibility complex, class I, E             | 55.48 | HLA-E    |
| ENSG00000205356 | 193.0263562 | 355.1605721 | -1.423620914 | 0.970311812 | -0.879673582 | 37627  | 56.22 | 7  | 98214624  | 98252521  | protein_coding       | tectonin beta-propeller repeat containing 1              | 56.22 | TECPRI1  |
| ENSG00000205363 | 646.3803237 | 1016.341025 | -1.530850404 | 0.976210576 | -0.652929381 | 17316  | 54.89 | 15 | 73735431  | 73752747  | protein_coding       | chromosome 15 open reading frame 59                      | 54.89 | C15orf59 |
| ENSG00000206503 | 4060.247822 | 5535.171965 | -1.538554893 | 0.976377743 | -0.447060352 | 4624   | 55.18 | 6  | 29941260  | 29945884  | protein_coding       | major histocompatibility complex, class I, A             | 55.18 | HLA-A    |
| ENSG00000211450 | 59.09508387 | 148.891651  | -1.405821619 | 0.967709018 | -1.333152836 | 2304   | 51.67 | 11 | 57741250  | 57743554  | protein_coding       | selenoprotein H                                          | 51.67 | SELENOH  |
| ENSG00000212864 | 47.28488986 | 136.2000008 | -1.636187461 | 0.981474808 | -1.52627557  | 1334   | 68.39 | 9  | 137220247 | 137221581 | protein_coding       | ring finger protein 208                                  | 68.39 | RNF208   |
| ENSG00000213442 | 1747.42573  | 2520.815875 | -1.435480021 | 0.97216624  | -0.528659606 | 527    | 60.73 | 12 | 104265309 | 104265836 | processed_pseudogene |                                                          | 60.73 | RPL18AP3 |
| ENSG00000213445 | 136.7895509 | 278.9331572 | -1.467767404 | 0.975498938 | -1.02796141  | 12833  | 60.34 | 11 | 65638097  | 65650930  | protein_coding       | signal-induced proliferation-associated 1                | 60.34 | SIPA1    |
| ENSG00000213465 | 273.3027225 | 463.0330865 | -1.327395996 | 0.959150586 | -0.760615455 | 8071   | 55.34 | 11 | 65014113  | 65022184  | protein_coding       | ADP ribosylation factor like GTPase 2                    | 55.34 | ARL2     |
| ENSG00000213639 | 10022.54317 | 7123.228234 | 1.973250426  | 0.956453392 | 0.49264551   | 51300  | 38.98 | 2  | 28751640  | 28802940  | protein_coding       | protein phosphatase 1 catalytic subunit beta             | 38.98 | PPP1CB   |
| ENSG00000213923 | 1031.54622  | 1411.984812 | -1.344097316 | 0.961612952 | -0.452916105 | 27393  | 55.79 | 32 | 38290691  | 38318084  | protein_coding       | casein kinase 1 epsilon                                  | 55.79 | CSNK1E   |
| ENSG00000214063 | 247.3725947 | 487.1981098 | -1.472880634 | 0.975725404 | -0.977822857 | 24308  | 65.01 | 11 | 842808    | 8671116   | protein_coding       | tetraspanin 4                                            | 65.01 | TSPAN4   |
| ENSG00000214357 | 890.9043999 | 1400.147012 | -1.388548433 | 0.965948031 | -0.652235781 | 50274  | 50.74 | 5  | 172641266 | 172691540 | protein_coding       | neuralized E3 ubiquitin protein ligase 1B                | 50.74 | NEURL1B  |
| ENSG00000215908 | 53.90400706 | 112.1239941 | -1.283140765 | 0.953777115 | -1.056630614 | 38979  | 52.04 | 1  | 16618253  | 16657232  | transcribed_unq      | ciliary rootlet coiled-coil, rootletin pseudogene 2      | 52.04 | CROCCP2  |
| ENSG00000224051 | 432.0987503 | 927.765442  | -2.195336526 | 0.98572543  | -1.10239905  | 4141   | 65.26 | 1  | 1324756   | 1328897   | protein_coding       | ceramide-1-phosphate transfer protein                    | 65.26 | CPTP     |
| ENSG00000225663 | 433.653274  | 892.8052321 | -1.919150614 | 0.988845795 | -1.04180348  | 10941  | 59.8  | 17 | 81822361  | 81833302  | protein_coding       | MAPK regulated corepressor interacting protein 1         | 59.8  | MCRP1    |
| ENSG00000227097 | 1300.211078 | 2596.097567 | -2.419427972 | 0.984040985 | -0.997598753 | 209    | 61.9  | 11 | 82689559  | 82689768  | processed_pseudogene |                                                          | 61.9  | RPS28P7  |
| ENSG00000228300 | 28.30370873 | 79.02562622 | -1.444819238 | 0.973462854 | -1.481329456 | 3811   | 63.69 | 19 | 1275438   | 1279249   | protein_coding       | chromosome 19 open reading frame 24                      | 63.69 | C19orf24 |
| ENSG00000230715 | 8.042153728 | 31.55328456 | -1.504939641 | 0.976099924 | -1.972136372 | 402    | 65.26 | 7  | 128652841 | 128653243 | processed_pseudogene |                                                          | 65.26 |          |
| ENSG00000231686 | 12.73979448 | 35.48242611 | -1.423829535 | 0.970344915 | -1.477762654 | 987    | 63.97 | X  | 146619597 | 146620584 | processed_pseudogene |                                                          | 63.97 |          |
| ENSG00000231925 | 837.4738376 | 1208.866405 | -1.366044083 | 0.964201977 | -0.529538791 | 14693  | 50.01 | 6  | 33299694  | 33314387  | protein_coding       | TAP binding protein                                      | 50.01 | TAPBP    |
| ENSG00000233276 | 393.747533  | 726.6976821 | -1.561890634 | 0.9774385   | -0.88408442  | 1424   | 63.79 | 3  | 49357176  | 49358600  | protein_coding       | glutathione peroxidase 1                                 | 63.79 | GPX1     |
| ENSG00000234745 | 5119.095428 | 6897.831616 | -1.24909055  | 0.950977905 | -0.430254011 | 87697  | 42.89 | 6  | 31269491  | 31357188  | protein_coding       | major histocompatibility complex, class I, B             | 42.89 | HLA-B    |
| ENSG00000242802 | 67.82462656 | 156.4169209 | -1.376740323 | 0.965061456 | -1.19626248  | 18690  | 58.29 | 7  | 4775622   | 4794312   | protein_coding       | adaptor related protein complex 5 zeta 1 subunit         | 58.29 | AP5Z1    |
| ENSG00000243679 | 8.179954698 | 33.77667643 | -1.684318266 | 0.979773759 | -2.045862618 | 753    | 67.24 | 7  | 128653969 | 128654722 | processed_pseudogene |                                                          | 67.24 |          |
| ENSG00000247596 | 536.2256811 | 1027.038116 | -1.885616596 | 0.987280729 | -0.937577504 | 10650  | 59.9  | 3  | 52228610  | 52239260  | protein_coding       | twinfilin actin binding protein 2                        | 59.9  | TWF2     |
| ENSG00000249780 | 4.692886366 | 35.8578012  | -1.34302993  | 0.961460034 | -2.933795953 | 339    | 47.35 | 4  | 12640298  | 12640637  | processed_pseudogene |                                                          | 47.35 |          |
| ENSG00000250479 | 2299.293667 | 3120.713612 | -1.334363922 | 0.960179647 | -0.440685227 | 2609   | 64.1  | 22 | 23765834  | 23768443  | protein_coding       | coiled-coil-helix-coiled-coil-helix domain containing 10 | 64.1  | CHCHD10  |
| ENSG00000251322 | 291.439307  | 613.6516338 | -1.429083456 | 0.971178742 | -1.074224409 | 58883  | 57.13 | 22 | 50674415  | 50733298  | protein_coding       | SH3 and multiple ankyrin repeat domains 3                | 57.13 | SHANK3   |
| ENSG00000255302 | 8029.473759 | 6204.741812 | 2.551972309  | 0.999995963 | 0.37193426   | 2297   | 41.64 | 15 | 48877886  | 48880183  | protein_coding       | EP300 interacting inhibitor of differentiation 1         | 41.64 | EID1     |
| ENSG00000261236 | 143.9797784 | 270.8684031 | -1.372649191 | 0.964752554 | -0.91172591  | 29268  | 62.27 | 8  | 144262102 | 144291370 | protein_coding       | block of proliferation 1                                 | 62.27 | BOP1     |
| ENSG00000262814 | 11.54166451 | 47.8516697  | -1.597357685 | 0.97974177  | -2.05171965  | 4169   | 57.67 | 17 | 81703357  | 81707526  | protein_coding       | mitochondrial ribosomal protein L12                      | 57.67 | MRPL12   |
| ENSG00000272333 | 211.8916727 | 366.3398435 | -1.27005617  | 0.952412513 | -0.789855727 | 20859  | 59.77 | 19 | 35718019  | 35738878  | protein_coding       | lysine methyltransferase 2B                              | 59.77 | KMT2B    |
| ENSG00000275023 | 1544.676471 | 2024.367598 | -1.423165173 | 0.970239508 | -0.390166587 | 24261  | 56.24 | 17 | 38705542  | 38729803  | protein_coding       | MLLT6, PHD finger containing                             | 56.24 | MLLT6    |

## Supplementary Table S2. Predicted GO terms for biological process and molecular function of the genes

### GO Biological Process

| Term                                                                                                                     | Overlap | P-value           | Adjusted P-value  | Z-score        | Combined Scor Genes                                                                                                        |
|--------------------------------------------------------------------------------------------------------------------------|---------|-------------------|-------------------|----------------|----------------------------------------------------------------------------------------------------------------------------|
| cardiac muscle contraction (GO:0060048)                                                                                  | 13/57   | 7.14712690213e-08 | 0.000453842558285 | -2.683750501   | 44.1583510356 MYBPC3;KCNH2;GPX1;ACE;GAA;GRK2;TNNT2;KCNQ1;TCAP;ALDOA;OBSL1;MYH6;MYH7                                        |
| cardiac muscle cell contraction (GO:0086003)                                                                             | 9/36    | 3.31103442812e-06 | 0.0080348186545   | -2.36987178811 | 29.9036344566 MYBPC3;KCNH2;GRK2;GAA;TNNT2;KCNQ1;TCAP;MYH6;MYH7                                                             |
| basement membrane organization (GO:0071711)                                                                              | 17/144  | 1.3918583496e-05  | 0.0080348186545   | -3.1224851307  | 34.9165207274 COL18A1;LAMA5;SPARC;VWF;LAMB2;FURIN;HSPG2;COL1A1;COL3A1;COL4A2;ADAM15;COL4A1;COL6A2;BSG;COL6A1;PXD;AGRN      |
| biofilm matrix organization (GO:0098784)                                                                                 | 17/143  | 1.26853018082e-05 | 0.0080348186545   | -3.10669347986 | 35.0281758063 COL18A1;LAMA5;SPARC;VWF;LAMB2;FURIN;HSPG2;COL1A1;COL3A1;COL4A2;ADAM15;COL4A1;COL6A2;BSG;COL6A1;PXD;AGRN      |
| extracellular matrix organization in marginal zone involved in cerebral cortex radial glia guided migration (GO:0021820) | 17/143  | 1.26853018082e-05 | 0.0080348186545   | -3.09977717801 | 34.9501940425 COL18A1;LAMA5;SPARC;VWF;LAMB2;FURIN;HSPG2;COL1A1;COL3A1;COL4A2;ADAM15;COL4A1;COL6A2;BSG;COL6A1;PXD;AGRN      |
| cellulose microfibril organization (GO:0010215)                                                                          | 17/143  | 1.26853018082e-05 | 0.0080348186545   | -3.10551910715 | 35.0149346758 COL18A1;LAMA5;SPARC;VWF;LAMB2;FURIN;HSPG2;COL1A1;COL3A1;COL4A2;ADAM15;COL4A1;COL6A2;BSG;COL6A1;PXD;AGRN      |
| extracellular matrix organization involved in endocardium development (GO:0061148)                                       | 17/143  | 1.26853018082e-05 | 0.0080348186545   | -3.09906633408 | 34.9421792299 COL18A1;LAMA5;SPARC;VWF;LAMB2;FURIN;HSPG2;COL1A1;COL3A1;COL4A2;ADAM15;COL4A1;COL6A2;BSG;COL6A1;PXD;AGRN      |
| extracellular matrix organization (GO:0030198)                                                                           | 17/143  | 1.26853018082e-05 | 0.0080348186545   | -3.10527723319 | 35.0122075308 COL18A1;LAMA5;SPARC;VWF;LAMB2;FURIN;HSPG2;COL1A1;COL3A1;COL4A2;ADAM15;COL4A1;COL6A2;BSG;COL6A1;PXD;AGRN      |
| endocytosis involved in viral entry into host cell (GO:0075509)                                                          | 13/80   | 4.35097093759e-06 | 0.0080348186545   | -2.94198959106 | 36.3191896327 CD81;INPPL1;TSC2;AP2A1;CSNK1E;DNM2;EHD1;GRK2;HOOK2;HYAL2;TOM1;GAS6;CSNK1G2                                   |
| extracellular matrix assembly (GO:0085029)                                                                               | 18/149  | 5.65818460904e-06 | 0.0080348186545   | -3.15211886175 | 38.0851844426 COL18A1;LAMA5;SPARC;VWF;LAMB2;FURIN;HSPG2;COL1A1;COL3A1;COL4A2;ADAM15;COL4A1;COL6A2;BSG;COL6A1;PXD;AGRN;GAS6 |

### GO Molecular Function

| Term                                                                          | Overlap | P-value           | Adjusted P-value  | Z-score        | Combined Scor Genes                                                                                                                                                                                                                    |
|-------------------------------------------------------------------------------|---------|-------------------|-------------------|----------------|----------------------------------------------------------------------------------------------------------------------------------------------------------------------------------------------------------------------------------------|
| cadherin binding involved in cell-cell adhesion (GO:0098641)                  | 36/294  | 9.19632470815e-11 | 7.16393694765e-08 | -2.87398300992 | 66.416690041 NOTCH3;TW2;CORO1B;FAM129B;SLC9A3R2;PUF60;PPP1R13L;PCBP1;BSG;EFHD2;FLNA;RPS2;SH3GL1;SCYL1;LYPLA2;JUP;DAB2IP;SCRIB;EEF2;HCFC1;RAB11B;EHD1;CTTN;GIP1;FSCN1;PLIN3;CDC42EP1;MYH9;RPL29;TLN1;ALDOA;CC2D1A;DBN1;PFKP;EIF4G1;PLEC |
| cadherin binding (GO:0045296)                                                 | 35/275  | 5.71569092837e-11 | 7.16393694765e-08 | -2.81329709452 | 66.3522332504 NOTCH3;TW2;CORO1B;FAM129B;SLC9A3R2;PUF60;PPP1R13L;PCBP1;BSG;EFHD2;FLNA;RPS2;SH3GL1;SCYL1;LYPLA2;JUP;DAB2IP;SCRIB;EEF2;HCFC1;RAB11B;EHD1;CTTN;GIP1;FSCN1;PLIN3;MYH9;RPL29;TLN1;ALDOA;CC2D1A;DBN1;PFKP;EIF4G1;PLEC         |
| protein kinase binding (GO:0019901)                                           | 32/352  | 1.15548013616e-06 | 0.000600079350711 | -2.98492621931 | 40.8069102199 HSPB1;AP2A1;PTPN23;PKD1;RPTOR;HSF1;DVL1;FLNA;MAP2K7;SLC12A7;TNS2;SLC12A4;FBXW5;BAD;DAB2IP;RAD23A;EEF2;TOM1L2;PER1;PFKL;TOLLIP;DGKQ;CDC37;TRIP6;EEF1A2;DOK7;STUB1;SQSTM1;LLGL1;MYH6;BCAR1;TELO2                           |
| actin filament binding (GO:0051015)                                           | 22/208  | 4.97214701632e-06 | 0.00193665126286  | -2.69725355245 | 32.9379401225 MYBPC3;FLII;TPM2;HIP1R;ACTN4;SPTB;TRIOBP;CORO1B;SMTN;MAEA;TNNT2;GIP1;CORO6;MYO18A;FSCN1;MYH14;FLNA;MYH9;SYNPO;ALDOA;OBSL1;DBN1                                                                                           |
| kinase binding (GO:0019900)                                                   | 11/62   | 9.92231502989e-06 | 0.00309179336331  | -2.19229645459 | 25.2568430239 PER1;PFKL;TOLLIP;CDC37;DGKQ;TRIP6;DAB2IP;FLNA;RAD23A;STUB1;TNS2                                                                                                                                                          |
| phosphatidylinositol 3-kinase catalytic subunit binding (GO:0036313)          | 11/64   | 1.36129883527e-05 | 0.00353483930891  | -2.14992550041 | 24.0888105897 PER1;PFKL;TOLLIP;CDC37;DGKQ;TRIP6;DAB2IP;FLNA;RAD23A;STUB1;TNS2                                                                                                                                                          |
| actin lateral binding (GO:0003786)                                            | 14/109  | 3.05884345426e-05 | 0.00680811157391  | -2.26594714495 | 23.5542680921 MYBPC3;TPM2;HIP1R;ACTN4;SPTB;CORO1B;TRIOBP;CORO6;FSCN1;MYO18A;MYH14;FLNA;MYH9;OBSL1                                                                                                                                      |
| mitogen-activated protein kinase kinase binding (GO:0031434)                  | 26/305  | 3.50994989436e-05 | 0.00683562741927  | -2.89593590844 | 29.7045520352 ARAF;HSPB1;AP2A1;PTPN23;PKD1;RPTOR;HSF1;DVL1;MAP2K7;SLC12A7;SLC12A4;ACE;FBXW5;BAD;DAB2IP;EEF2;TOM1L2;TAOK2;EEF1A2;DOK7;PIN1;SQSTM1;LLGL1;MYH6;BCAR1;TELO2                                                                |
| integrin binding involved in cell-matrix adhesion (GO:0098640)                | 11/78   | 9.09122929083e-05 | 0.015737928039    | -1.9649903343  | 18.285444179 LAMA5;COL3A1;TNXB;CD151;VWF;ADAM15;LTBP4;TSPAN4;EMILIN1;ACTN4;TLN1                                                                                                                                                        |
| eukaryotic translation initiation factor 2alpha kinase activity (GO:0004694)" | 22/296  | 0.000906085723927 | 0.0273959114111   | -2.93048588509 | 20.5320878444 CAMK2B;CDK18;SRPK3;MAP2K2;DMPK;ARAF;CSNK1E;BCKDK;STK11;AKT2;WNK2;FASTK;TAOK2;MKNK2;AKT1;MAP3K10;ULK1;PIM3;PKN1;SQSTM1;MAP3K11;CSNK1G2                                                                                    |

**Supplementary Table S3. Predicted upstream regulators identified in HFpEF proxy using Ingenuity Pathway Analysis. (Activation Z-score  $\geq \pm 2$ , p-value of overlap  $\leq 0.05$ ).**

| Upstream Regulator | Molecule Type                     | Predicted Activation | Activation Z-score | p-value of overlap | Target molecules in DE gene set                                                                                                                                                                                                                                                                                                                                                                                                                                                                                                                                                                   |
|--------------------|-----------------------------------|----------------------|--------------------|--------------------|---------------------------------------------------------------------------------------------------------------------------------------------------------------------------------------------------------------------------------------------------------------------------------------------------------------------------------------------------------------------------------------------------------------------------------------------------------------------------------------------------------------------------------------------------------------------------------------------------|
| TP53               | transcription regulator           | Inhibited            | -3,641             | 5,03E-09           | A2M,ACE,ACOT11,ACTN4,ADAMTSL4,AKT1,APOE,ATG4B,CAMK2B,CARD10,CD81,CKB,CKM,CLIC4,CLPP,COL18A1,COL1A1,COL3A1,COL4A1,COL4A2,COL6A2,COMT,COQ8A,CTDSP1,CTSD,DLD,DNM2,DPYSL4,ECH1,EMILIN1,ERCC1,GADD45G,GAS6,GPI,GPX1,GSTP1,H19,HDAC5,HLA-B,HSF1,HSPB1,HSPB7,HSPG2,IDH2,IGF2,IGFBP2,IGFBP3,IGFBP5,IRF7,ISG15,KANK3,KLHL21,KRT8,LAMA5,LAMB2,LSS,MAP2K2,MAP2K7,MTA1,MYH9,MYL9,MYO1C,NCOR2,NDUFA4,L2,NINJ1,NLRX1,NOTCH1,PFKP,PLXNB2,POLD1,POLR2E,PPM1F,PPP1R13L,PRDX3,PTGDS,PTP4A3,RAD23A,RALY,RUVBL2,SCRIB,SEPT5,SHISA5,SIVA1,SPHK2,STK11,TINAGL1,TOM1,TP53I11,TRIM28,TSC2,TSPO,ULK1,UNC5B,VEGFB,YPEL3,ZYX |
| ERBB2              | kinase                            | Inhibited            | -2,783             | 9,59E-07           | AKT1,AKT2,ALDOC,BCAT2,CAPN15,CAPZA2,CDC37,CHCHD10,COL18A1,COL1A1,COL3A1,COL4A1,COL6A1,COL6A2,DGAT1,DL1,FSCN1,GAS6,GPA1,GPC1,H19,HSPB1,IGF2,IGFBP3,IGFBP5,JAG2,JUP,KIFC3,LGALS1,LTBP3,LUM,MAPK8IP3,MKNK2,MYL9,NDUFV1,NOTCH1,NOTCH3,NOTCH4,NR1H2,PHLDB1,PIN1,POLD1,POLR2E,POLR2L,PQLC1,SKP1,SMTN,SPARC,TAPBP,TK1,VWF,WFS1                                                                                                                                                                                                                                                                           |
| MKNK1              | kinase                            | Inhibited            | -3,742             | 7,85E-06           | AGRN,AP3D1,ARVCF,ATP1A3,FLNA,GPS1,ISG15,LAMB2,MAPK8IP3,NCDN,PLXNB2,RNH1,SPARC,STRN4                                                                                                                                                                                                                                                                                                                                                                                                                                                                                                               |
| FAS                | transmembrane receptor            | Activated            | 2,091              | 1,17E-05           | AKT2,ARFGAP1,ARHGEF1,BAD,CABIN1,CAMK2B,CLTB,COL18A1,COL1A1,COL3A1,COL4A1,COL4A2,COL6A1,CSNK1G2,DGCR2,DGKZ,ERCC1,FSCN1,GADD45G,GNAI2,GTPBP6,HLA-DQB1,LUM,NUMA1,PLEC,RGS3,SIPA1,SPG7,TWF2,TYK2                                                                                                                                                                                                                                                                                                                                                                                                      |
| KDM5A              | transcription regulator           | Activated            | 2,84               | 3,54E-05           | DMPK,GADD45GIP1,MAP2K7,MRPL12,MRPL55,MYH6,MYH7,NDUFA3,NDUFA5,NDUFS7,NDUFV1,SDHD,TCAP,TNNT2,UQCRC1                                                                                                                                                                                                                                                                                                                                                                                                                                                                                                 |
| SRF                | transcription regulator           | Inhibited            | -2,58              | 3,55E-05           | A2M,CENPB,CKM,CLDN5,FLNA,GOS2,GADD45G,GATA4,HSPG2,LDB3,LRP1,MCF2L,MYH6,MYH7,MYH9,MYL9,NKX2-5,RAMP1,RNH1,SCYL1,SMTN,SREBF2,TCAP,TLN1,TNNT2,TST,ZYX                                                                                                                                                                                                                                                                                                                                                                                                                                                 |
| MAP4K4             | kinase                            | Activated            | 2,673              | 4,70E-05           | ACACB,ACADS,ARAF,BCAT2,CYC1,DLD,HYAL2,MGLL,NDUFA3,NDUFA5,NDUF7,NDUFS8,NDUFV1,UQCRC1                                                                                                                                                                                                                                                                                                                                                                                                                                                                                                               |
| ESR1               | ligand-dependent nuclear receptor | Activated            | 3,578              | 8,04E-05           | ACE,AKT1,AKT2,ANAPC2,AP1M1,APOE,ARAF,ARFGAP1,CAMK2B,CKB,COMT,COPE,CTSD,DNM2,ESRRA,FLNA,H19,HIP1R,HLA-B,HLA-C,HLA-E,HOOK2,IFIT2,IFITM3,IGF2,IGFBP2,IGFBP3,IGFBP5,KDM4B,LAMB2,LGALS1,LGALS3BP,LTBP4,MAP2K2,MAP2K7,MAPK8IP3,MCF2L,MIB2,NOTCH1,NOTCH3,NR1H2,NUCB1,OBSCN,PHLDB1,PPP2R1A,PPP6R2,RGS3,RHOQ,SGSM3,SHANK3,SHC2,SIGIRR,SLC12A4,SLC2A4R6,SLC6A8,SPG7,SQSTM1,SYNPO,TAPBP,TIMM13,TOM1,TP53I11,TSC2,TSPO,TYK2,UBALD1,USP19,VPS28,YPEL3,ZBTB7B                                                                                                                                                   |
| HTT                | transcription regulator           | Inhibited            | -3,286             | 1,65E-04           | ADCY5,AGRN,AKT1,AKT2,ALDOA,ALDOC,APOE,ATP1A3,CAMK2B,CKM,COL18A1,COL4A1,COL4A2,COL6A1,COX6A2,CSNK1E,CTDSP1,CTSD,CTTN,CYC1,CYCS,DL1,EC1,EEF2,FAM173A,GADD45G,GPC1,GPI,GRK2,IGF2,IGFBP5,JUP,NDUFA3,NDUFA5,NDUFS7,NFIC,PER1,PITPNM1,PTPN23,SGTA,SQSTM1,STRN4,TCF3                                                                                                                                                                                                                                                                                                                                     |
| IGF1R              | transmembrane receptor            | Inhibited            | -2,246             | 3,10E-04           | ACADS,ACTN4,ALDOA,ATP5D,COL18A1,COL1A1,COL3A1,COL4A1,COL4A2,COX6A2,CTSD,CYCS,FLNC,FTH1,H19,IGF2,IGFBP3,IGFBP5,MYH7,NDUFA3,UQCRC1                                                                                                                                                                                                                                                                                                                                                                                                                                                                  |
| VEGFA              | growth factor                     | Inhibited            | -3,098             | 3,92E-04           | ACE,ADAM15,AKT1,BCAT2,CDH5,CLIC4,COL1A1,DL1,EPHB4,HLA-DQB1,IGFBP5,LMNA,MMP15,MRPS12,NOTCH1,NOTCH4,SDHD,SMTN,SPARC,TIMM13,TSP O,UNC5B                                                                                                                                                                                                                                                                                                                                                                                                                                                              |
| miR-296-5p         | mature microRNA                   | Activated            | 2,186              | 4,48E-04           | AKT1,COL1A1,HGS,LYPLA2,SCRIB                                                                                                                                                                                                                                                                                                                                                                                                                                                                                                                                                                      |
| PLAG1              | transcription regulator           | Inhibited            | -2,767             | 5,00E-04           | CLTB,CRIP2,FLNC,IGF2,PLEC,PTP4A3,SRPK3,TSPAN4                                                                                                                                                                                                                                                                                                                                                                                                                                                                                                                                                     |
| EBF1               | transcription regulator           | Inhibited            | -2,646             | 5,19E-04           | ACACB,AKT2,ARAF,COL1A1,INPPL1,IRF7,MKNK2,PFKP,PPP1CB,PYGB,RHOQ,RPTOR,TCF3                                                                                                                                                                                                                                                                                                                                                                                                                                                                                                                         |
| MYOD1              | transcription regulator           | Inhibited            | -2,29              | 7,40E-04           | ACACB,ALDOA,CKM,COL4A1,GADD45G,IGF2,IGFBP5,KIFC3,LDB3,MYH7,RAPSN,RBM38,RRAS,SGCA,TNNT2,TNS1                                                                                                                                                                                                                                                                                                                                                                                                                                                                                                       |
| RICTOR             | other                             | Activated            | 2,441              | 7,54E-04           | ATP5D,BAD,BSG,COX6A2,CYC1,ISG15,NDUFA3,NDUFA4L2,NDUFA5,NDUF7,NDUFS6,NDUFS7,NDUFS8,NDUFV1,RPL28,RPLP2,RPS15,RPS2,SDHD,UQCRC1                                                                                                                                                                                                                                                                                                                                                                                                                                                                       |
| UHRF2              | enzyme                            | Inhibited            | -2,236             | 1,10E-03           | AKT1,CKB,CRIP2,JAG2,SIVA1                                                                                                                                                                                                                                                                                                                                                                                                                                                                                                                                                                         |
| HIF1A              | transcription regulator           | Inhibited            | -2,904             | 1,40E-03           | ADAM15,AKT1,ALDOA,ALDOC,APOE,ATG9A,CABIN1,CD164,CTSD,EIF4G1,FSCN1,FURIN,GPI,HSPB1,IGF2,IGFBP2,IGFBP3,IGFBP5,JUP,KDM4B,KIFC2,LGALS1,NOTCH1,PFKL,POLRMT,SLC29A1                                                                                                                                                                                                                                                                                                                                                                                                                                     |
| STAT4              | transcription regulator           | Inhibited            | -4,088             | 1,72E-03           | ALDOC,BAD,BSG,FSCN1,FURIN,GADD45G,HLA-DQB1,ISG15,JAG2,LRP1,LTBP3,MAPK8IP3,PER1,PPP1R13L,RAMP1,VSIR,ZNF524                                                                                                                                                                                                                                                                                                                                                                                                                                                                                         |
| FOS                | transcription regulator           | Inhibited            | -2,66              | 1,96E-03           | A2M,AP3D1,ARF1,CD164,COL18A1,COL1A1,COL6A1,CYCS,E4F1,ERCC1,FBLIM1,FTH1,GAK,GATA4,GSTP1,HLA-B,IGFBP5,KRT8,LGALS3BP,LTBP3,MAFK,MT2A,MYH6,MYH9,NDUFS7,NOTCH4,PKN1,POMC,PTGDS,RGMA,RNH1,RXRA                                                                                                                                                                                                                                                                                                                                                                                                          |
| Smad2/3-Smad4      | complex                           | Inhibited            | -2                 | 2,19E-03           | COL1A1,IGFBP3,IGFBP5,IRF7                                                                                                                                                                                                                                                                                                                                                                                                                                                                                                                                                                         |
| PRL                | cytokine                          | Inhibited            | -2,852             | 2,56E-03           | A2M,BST2,CLDN5,COL1A1,COL3A1,CTSD,DVL1,GPSM1,HELZ2,IGF2,IGFBP3,IGFBP5,IRF7,ISG15,PIM3,RABAC1,RASD1,SHISA5,SPARC                                                                                                                                                                                                                                                                                                                                                                                                                                                                                   |
| B2M                | transmembrane receptor            | Inhibited            | -2,236             | 2,67E-03           | HLA-A,HLA-DQB1,HLA-DRB5,HLA-E,TAPBP                                                                                                                                                                                                                                                                                                                                                                                                                                                                                                                                                               |
| mir-122            | microRNA                          | Activated            | 2,259              | 2,96E-03           | ALDOA,BCAT2,CLIC4,FBLIM1,GIT1,GPT,PLIN3,SEPT9,SH3GL1                                                                                                                                                                                                                                                                                                                                                                                                                                                                                                                                              |
| WNT11              | other                             | Inhibited            | -2,232             | 3,11E-03           | GATA4,MYH6,MYH7,NKX2-5,TNNT2                                                                                                                                                                                                                                                                                                                                                                                                                                                                                                                                                                      |
| HOXA10             | transcription regulator           | Activated            | 2,138              | 3,22E-03           | APOE,ARL2,CHERP,CLDN5,COL3A1,GAS6,HLA-DQB1,IDH2,IGFBP3,IGFBP5,PPP1R13L,SCOC,SLC27A1,TNXB                                                                                                                                                                                                                                                                                                                                                                                                                                                                                                          |
| DLL4               | other                             | Activated            | 2,236              | 3,61E-03           | EGFL7,EPHB4,ESAM,LGALS1,UNC5B                                                                                                                                                                                                                                                                                                                                                                                                                                                                                                                                                                     |
| HEY2               | transcription regulator           | Activated            | 2,193              | 3,61E-03           | GATA4,MYH6,MYH7,NKX2-5,SMTN                                                                                                                                                                                                                                                                                                                                                                                                                                                                                                                                                                       |
| TGFB1              | growth factor                     | Inhibited            | -2,906             | 4,32E-03           | ABCD1,ACE,AKT1,APOE,ATG4B,BAD,BSG,CALM1 (includes others),CAND2,CAPN15,CCDC85B,CDH5,CKM,CLIC4,COL18A1,COL1A1,COL3A1,COL4A1,COL4A2,COL6A1,COL6A2,CRIP2,CTSD,CTTN,CYC1,EMILIN1,ERF,ESAM,FAM53B,FLNA,FSCN1,FTH1,FURIN,GNAI2,GPT,HLA-DQB1,HLA-DRB5,HSPB1,HSPG2,IFIT2,IGF2,IGFBP2,IGFBP3,IGFBP5,INHA,ITPK1,JAG2,JUP,KRT8,LTBP3,MAP3K11,MAPK8IP3,MXD4,MYH7,MYH9,MYO1C,NOTCH1,NOTCH3,PCBP1,PITPNM1,POLD1,POMC,PTGDS,PTP4A3,RNH1,RXRA,SHISA5,SLC12A4,SLC12A7,SLC22A18,SLC4A2,SMTN,SPARC,TNNT2,TPM2,ULK1,VPS28,VWF,WFS1,ZYX                                                                                |
| IPMK               | kinase                            | Inhibited            | -2                 | 5,89E-03           | FLNA,FLNC,MYL9,PER1                                                                                                                                                                                                                                                                                                                                                                                                                                                                                                                                                                               |
| SYVN1              | transporter                       | Inhibited            | -3,317             | 6,66E-03           | CALM1 (includes others),CD151,GNB2,HLA-A,HLA-C,HSPB1,LGALS3BP,MED25,MGRN1,PCBP1,PNPLA2                                                                                                                                                                                                                                                                                                                                                                                                                                                                                                            |
| NFE2L2             | transcription regulator           | Inhibited            | -4,358             | 7,89E-03           | ALDOA,APBA3,ARF1,CD34,CLPP,COL1A1,COL3A1,COL4A2,CTSD,EPHB4,FTH1,GADD45G,GNAI1,GNAI2,GPX1,GSTP1,KEAP1,KIFC2,LMNA,MGLL,PCBP1,PIP5K1C,PKIA,SQSTM1                                                                                                                                                                                                                                                                                                                                                                                                                                                    |

|                |                         |           |        |          |                                                                                                                                                                                                                                                                       |
|----------------|-------------------------|-----------|--------|----------|-----------------------------------------------------------------------------------------------------------------------------------------------------------------------------------------------------------------------------------------------------------------------|
| IL4            | cytokine                | Inhibited | -3,806 | 8,59E-03 | ABCA2,ALDOC,APOE,APRT,ATP1A3,BCAT2,BOP1,CENPB,CLDN5,CLUH,COL18A1,COL1A1,COL6A2,EPHB4,FLNA,GADD45G,GCAT,GPT,IRF7,ISG15,LGALS1,LGALS3BP,LRP1,LYL1,MYH9,NUMA1,PFKL,PFKP,PIN1,PLEC,PRMT1,SLC29A1,SPHK2,SQSTM1,STAB1,STUB1,SYNGR2,TAPBP,TINAGL1,TLN1,TM7SF2,TNFRSF4,UQCRC1 |
| miR-199a-5p    | mature microRNA         | Activated | 2,646  | 9,44E-03 | BCAM,COL1A1,COL4A1,IFI27,ISG15,MYL9,SMTN                                                                                                                                                                                                                              |
| GLI1           | transcription regulator | Inhibited | -2,745 | 9,58E-03 | AKT1,CDC34,COL1A1,GATA4,IGF2,JAG2,JUP,LMNA,NPDC1,POMC,RXRA,SOX18,TOM1,ULK1                                                                                                                                                                                            |
| ACOX1          | enzyme                  | Activated | 2,714  | 1,01E-02 | COL4A2,CRAF,FABP2,GSTP1,HLA-DRB5,IGFBP2,KRT8,IGALS3BP,LONP1,MGLL,SQSTM1                                                                                                                                                                                               |
| miR-124-3p     | mature microRNA         | Activated | 3,219  | 1,13E-02 | ARAF,ARHGEF1,CD164,CTDSP1,DNM2,FAM129B,GAS2L1,HDAC5,MYH9,NFIC,PPP1R13L,RNPEPL1,SYNGR2,TLN1,TSC2D4                                                                                                                                                                     |
| miR-125b-5p    | mature microRNA         | Activated | 2,183  | 1,37E-02 | ANAPC16,CDH5,DUS1L,IGFBP3,MAP2K7,MAP3K11,RABL6,VSIR                                                                                                                                                                                                                   |
| DNMT3B         | enzyme                  | Activated | 2,53   | 1,51E-02 | ABCD1,ADCY5,CKM,GATA4,HLA-DQB1,IFI27,MYH14,MYH6,MYH7,MYH7B,MYL9,TNNT2                                                                                                                                                                                                 |
| SMARCA4        | transcription regulator | Inhibited | -4,239 | 1,60E-02 | A2M,ACE,ACTN4,ADAM15,ATG9A,CCDC85B,CKM,COL1A1,CORO6,CSNK1G2,FBLIM1,GADD45G,GCAT,GPX1,GSTP1,HLA-B,HLA-C,HLA-E,IFI27,IFITM3,IGFBP5,KIFC3,IGALS1,LMNA,LUM,MXD4,PCDH1,PHLDB1,PKIA,RAMP1,TNNT2                                                                             |
| IKBK           | kinase                  | Inhibited | -2,022 | 1,60E-02 | GPT,GRN,HLA-A,IRF7,ISG15,KCNH2,MYH6,MYH7,PLD3,RABEP2                                                                                                                                                                                                                  |
| INSR           | kinase                  | Inhibited | -2,785 | 1,63E-02 | ACADS,ACTN4,ATP5D,COX6A2,CRAF,CYC1,CYCS,ECL1,FLNC,FURIN,GRN,H19,IGF2,IGALS1,LRP10,LSS,MYH7,NDUFA3,RUVBL2,SLC29A1,SREBF2,UQCRC1                                                                                                                                        |
| TRIM24         | transcription regulator | Activated | 2,646  | 1,73E-02 | AGRN,IRF7,ISG15,IGALS3BP,NUMA1,PACIN3,PLEC,SHISA5                                                                                                                                                                                                                     |
| TP73           | transcription regulator | Inhibited | -2,48  | 2,06E-02 | COL18A1,COL1A1,CTSD,IDH2,IGFBP3,IGFBP5,JAG2,KCNQ1,KLHL21,LDHD,PTP4A3,ROBO4,SHISA5,SLC4A3,SPHK2,STK11,TP53I11,TSC2,ULK1                                                                                                                                                |
| RB1            | transcription regulator | Inhibited | -3,178 | 2,33E-02 | AKT1,CKM,DMPK,GADD45GIP1,KANK2,MAP2K7,MRPL12,MRPL55,MYH6,MYH7,NDUFA3,NDUFA5,NDUFS7,NDUFV1,NKX2-5,POMC,SDHD,TCAP,TNNT2,ULK1,UQCRC1                                                                                                                                     |
| IgG            | complex                 | Activated | 2,714  | 2,73E-02 | APOE,CLDN5,COL3A1,GPX1,GUK1,HLA-E,HSPB1,IFITM3,ISG15,IGALS1,TAPBP                                                                                                                                                                                                     |
| SCAP           | other                   | Inhibited | -2,219 | 3,33E-02 | ACACB,ALDOC,LSS,SREBF2,TM7SF2                                                                                                                                                                                                                                         |
| IFI16          | transcription regulator | Inhibited | -2,425 | 4,17E-02 | BAD,CD81,GATA4,GPX1,ISG15,NKX2-5                                                                                                                                                                                                                                      |
| IFNL1          | cytokine                | Inhibited | -2,449 | 4,17E-02 | BST2,HLA-C,IFI27,IFITM3,ISG15,IGALS3BP                                                                                                                                                                                                                                |
| EGLN           | group                   | Activated | 2,646  | 4,46E-02 | ALDOC,BCKDK,DPYSL4,HLA-B,PFKP,RTL8C,SLC27A1                                                                                                                                                                                                                           |
| RUVBL1         | transcription regulator | Inhibited | -2     | 4,57E-02 | ADAM15,IGFBP3,KDM4B,KIFC2                                                                                                                                                                                                                                             |
| Growth hormone | group                   | Inhibited | -2,185 | 4,91E-02 | APOE,COL18A1,COL1A1,COL3A1,COMT,FTH1,GPT,GSTP1,IGF2,IGFBP2,IGFBP3,IGFBP5,PRDX3                                                                                                                                                                                        |

Column descriptions: ID; Regulator Effects network ID, Consistency Score; The Consistency Score is a measure of how causally consistent and densely connected a Regulator Effects network is, Node total; Sum of the number of regulators, targets and disease/Function nodes, Regulator total; Number of regulators in the network, Regulators; List of regulators participating in the network, Target total; Number of Targets from your dataset interacting with the regulators, Targets; List of the targets in the network, Diseases and Functions total; Number of Functions and Diseases in the network, Diseases and Functions; List of the Diseases and Functions, Known Regulator-Disease-Function Relationship; Percent of possible regulator to disease/function relationships that are already known. For example, in a particular Regulator Effects network that consists of 4 regulators and 2 disease and functions nodes there are 8 possible relationships. If none of the relationships were known in the Ingenuity Knowledge Base then the result would be "0%(0/8)". Networks with a 0% value are ones where there is no known prior relationship between the regulators and the diseases/functions.



**Supplementary Table S4. Regulatory effect networks identified using Ingenuity Pathway Analysis.**

| <b>ID</b> | <b>Consistency Score</b> | <b>Node Total</b> | <b>Regulator Total</b> | <b>Regulators</b>                | <b>Target Total</b> | <b>Target Molecules in DE gene set</b>                                                    | <b>Disease &amp; Function Total</b> | <b>Diseases &amp; Functions (A; predicted activation, I; predicted inhibition)</b>                                                            | <b>Known Regulator-Disease/Function Relationship</b> |
|-----------|--------------------------|-------------------|------------------------|----------------------------------|---------------------|-------------------------------------------------------------------------------------------|-------------------------------------|-----------------------------------------------------------------------------------------------------------------------------------------------|------------------------------------------------------|
| 1         | 9.500                    | 26                | 5                      | FOS,HEY2,IFI16,SRF,WNT11         | 16                  | CKM,FLNA,GATA4,GPX1,HSPG2,LDB3,MYH6,MYH7,MYH9,NKX2-5,PKN1,RXRA,SMTN,TCAP,TNNT2,ZYX        | 5                                   | Congenital heart disease (A), Failure of heart (A), Familial heart disease (A), Heart rate (I), Necrosis of cardiac muscle (A)                | 16% (4/25)                                           |
| 2         | 7.216                    | 23                | 6                      | DNMT3B,HEY2,IFI16, RB1,SRF,WNT11 | 14                  | ADCY5,DMPK,FLNA,GATA4,GPX1,HSPG2,LDB3,MYH6,MYH7,MYH9,NKX2-5,SMTN,TCAP,TNNT2               | 3                                   | Congenital heart disease (A), Familial heart disease (A), Heart rate (I)                                                                      | 22% (4/18)                                           |
| 3         | 6.500                    | 25                | 4                      | HEY2,IFI16,SMARCA4,WNT11         | 16                  | ACE,ACTN4,ADAM15,CD81,COL1A1,GATA4,GPX1,LGALS1,LMNA,LUM,MYH6,MYH7,NKX2-5,RAMP1,SMTN,TNNT2 | 5                                   | Congenital heart disease (A), Contraction of heart (I), Development of vasculature (I), Fibrosis of heart (A), Necrosis of cardiac muscle (A) | 45% (9/20)                                           |
| 4         | 5.196                    | 19                | 5                      | FOS,HEY2,SRF,TGFB1,WNT11         | 12                  | AKT1,FLNA,GATA4,GNAI2,HSPB1,HSPG2,MYH6,NKX2-5,NOTCH1,PKN1,RXRA,ZYX                        | 2                                   | Conotruncal heart malformations (A), Necrosis of cardiac muscle (A)                                                                           | 10% (1/10)                                           |
| 5         | 2.121                    | 11                | 2                      | DLL4,Growth hormone              | 8                   | APOE,COL18A1,EGFL7,EPHB4,ESAM,IGF2,IGFBP3,LGALS1                                          | 1                                   | Migration of endothelial cells (I)                                                                                                            | 50% (1/2)                                            |
| 6         | 2.121                    | 12                | 1                      | GLI1                             | 8                   | AKT1,COL1A1,GATA4,IGF2,JUP,LMNA,RXRA,SOX18                                                | 3                                   | Cardiac contractility (I), Function of cardiac muscle (I), Vasculogenesis (I)                                                                 | 33% (1/3)                                            |
| 7         | 0.756                    | 11                | 2                      | HIF1A,HTT                        | 7                   | ADCY5,APOE,CKM,GRK2,IGF2,JUP,NOTCH1                                                       | 2                                   | Cardiac contractility (I), Hypoplasia of heart ventricle (A)                                                                                  | 0% (0/4)                                             |
| 8         | -4.536                   | 9                 | 1                      | GLI1                             | 7                   | AKT1,COL1A1,GATA4,IGF2,JUP,RXRA,SOX18                                                     | 1                                   | Angiogenesis (I)                                                                                                                              | 100% (1/1)                                           |
| 9         | -5.367                   | 7                 | 1                      | TP53                             | 5                   | APOE,COL3A1,GPX1,HSPG2,SPHK2                                                              | 1                                   | Damage of blood vessel (A)                                                                                                                    | 0% (0/1)                                             |
| 10        | -5.814                   | 7                 | 1                      | IgG                              | 5                   | APOE,COL3A1,GPX1,HSPB1,LGALS1                                                             | 1                                   | Angiogenesis (I)                                                                                                                              | 100% (1/1)                                           |
| 11        | -6.000                   | 6                 | 1                      | TP73                             | 4                   | COL18A1,IGFBP3,PTP4A3,STK11                                                               | 1                                   | Migration of endothelial cells (I)                                                                                                            | 0% (0/1)                                             |
| 12        | -7.506                   | 5                 | 1                      | MYOD1                            | 3                   | CKM,MYH7,TNNT2                                                                            | 1                                   | Contractility of cardiac muscle (I)                                                                                                           | 0% (0/1)                                             |
| 13        | -7.506                   | 5                 | 1                      | TGFB1                            | 3                   | JUP,NOTCH1,RXRA                                                                           | 1                                   | Hypoplasia of trabeculae carne (A)                                                                                                            | 0% (0/1)                                             |
| 14        | -7.538                   | 13                | 1                      | ERBB2                            | 11                  | AKT1,COL18A1,COL4A1,GAS6,GPC1,HSPB1,IGF2,IGFBP3,LGALS1,SPARC,VWF                          | 1                                   | Cell movement of endothelial cells (I)                                                                                                        | 100% (1/1)                                           |
| 15        | -12.522                  | 7                 | 1                      | VEGFA                            | 5                   | ADAM15,AKT1,CDH5,EPHB4,SPARC                                                              | 1                                   | Migration of endothelial cells (I)                                                                                                            | 100% (1/1)                                           |
| 16        | -19.230                  | 7                 | 1                      | IGF1R                            | 5                   | COL18A1,COL4A1,COL4A2,IGF2,IGFBP3                                                         | 1                                   | Migration of endothelial cells (I)                                                                                                            | 0% (0/1)                                             |

**Column descriptions:** **ID;** Regulator Effects network ID, **Consistency Score;** The Consistency Score is a measure of how causally consistent and densely connected a Regulator Effects network is, **Node total;** Sum of the number of regulators, targets and disease/Function nodes, **Regulator total; Re** Number of regulators in the network, **Regulators;** List of regulators participating in the network, **Target total;** Number of Targets from your dataset interacting with the regulators, **Targets;** List of the targets in the network, **Diseases and Functions total;** Number of Functions and Diseases in the network, **Diseases and Functions;** List of the Diseases and Functions, **Known Regulator-Disease-Function Relationship;** Percent of possible regulator to disease/function relationships that are already known. For example, in a particular Regulator Effects network that consists of 4 regulators and 2 disease and functions nodes there are 8 possible relationships. If none of the relationships were known in the Ingenuity Knowledge Base then the results would be “0% (0/8)”. Networks with a 0% value are ones where there is no know prior relationship between the regulators and the diseases/functions.
